# Supplementary material for: Probing hyperconjugative aromaticity of cyclopentadiene and pyrroliums containing groups 13, 15, and 16 substituents
Source: Royal Society of Chemistry journal article supplement (doi:10.1039/d4nj04234d), 2024-12-27
Supplement: d4nj04234d1.pdf [file d4nj04234d1.pdf]

## Supporting Information

### Probing Hyperconjugative Aromaticity of Cyclopentadiene and Pyrroliums Containing Groups 13, 15, 16 Substituents

Fangzhou Xu, Jiaying Su, Jun Yan, Zijie Qiu and Jun Zhu\*

School of Science and Engineering, The Chinese University of Hong Kong, Shenzhen, Guangdong 518172, China; State Key Laboratory of Physical Chemistry of Solid Surfaces and Collaborative Innovation Center of Chemistry for Energy Materials (iChEM), Fujian Provincial Key Laboratory of Theoretical and Computational Chemistry and Department of Chemistry, College of Chemistry and Chemical Engineering, Xiamen University, Xiamen 361005, China

\*Email: jun.zhu@cuhk.edu.cn

#### Table of Contents

|                                                                                              |        |
|----------------------------------------------------------------------------------------------|--------|
| 1. Screening of calculation methods.....                                                     | S2     |
| 2. The distorted structures of <b>Al.1</b> , <b>Al.2</b> , <b>Ga.1</b> , <b>Ga.2</b> , ..... | S3     |
| 3. Linear correlation graph.....                                                             | S4-S5  |
| 4. PIO analysis.....                                                                         | S6-S7  |
| 5. ACID plot.....                                                                            | S8-S13 |
| 6. Cartesian coordinates.....                                                                | S14    |

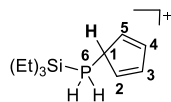

**Figure S1.** Structure of  $C_{11}H_{22}PSi^+$ .

**Table S1.** Comparison of bond lengths ( $\text{\AA}$ ) and relative deriviations (RD).

|                 | C1-C2 | C2-C3 | C3-C4 | C4-C5 | C5-C1 | RD(%) |
|-----------------|-------|-------|-------|-------|-------|-------|
| Exp.            | 1.462 | 1.348 | 1.466 | 1.337 | 1.516 | 0.0   |
| B3LYP           | 1.519 | 1.352 | 1.475 | 1.352 | 1.518 | 1.2   |
| PBE0            | 1.509 | 1.353 | 1.467 | 1.352 | 1.508 | 1.1   |
| M06             | 1.506 | 1.35  | 1.466 | 1.349 | 1.505 | 1.0   |
| M06L            | 1.508 | 1.355 | 1.464 | 1.354 | 1.507 | 1.1   |
| M06-2X          | 1.512 | 1.348 | 1.474 | 1.348 | 1.511 | 1.0   |
| TPSS            | 1.519 | 1.363 | 1.473 | 1.363 | 1.519 | 1.5   |
| $\omega$ B97X-D | 1.512 | 1.347 | 1.471 | 1.346 | 1.511 | 1.0   |

$$RD = \Sigma[(|BL_{func.} - BL_{exp.}|) / BL_{exp.}] / n.$$

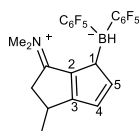

**Figure S2.** Structure of  $C_{23}H_{26}BF_{10}$ .

**Table S2.** Comparison of bond lengths ( $\text{\AA}$ ) and relative deriviations (RD).

|                 | C1-C2 | C2-C3 | C3-C4 | C4-C5 | C5-C1 | RD(%) |
|-----------------|-------|-------|-------|-------|-------|-------|
| Exp.            | 1.488 | 1.364 | 1.423 | 1.351 | 1.480 | 0.0   |
| B3LYP           | 1.484 | 1.389 | 1.415 | 1.374 | 1.466 | 1.1   |
| PBE0            | 1.476 | 1.386 | 1.412 | 1.372 | 1.459 | 1.2   |
| M06             | 1.472 | 1.386 | 1.405 | 1.373 | 1.45  | 1.5   |
| M06L            | 1.472 | 1.392 | 1.405 | 1.376 | 1.452 | 1.6   |
| M06-2X          | 1.478 | 1.385 | 1.416 | 1.371 | 1.46  | 1.1   |
| TPSS            | 1.484 | 1.399 | 1.416 | 1.383 | 1.466 | 1.3   |
| $\omega$ B97X-D | 1.48  | 1.379 | 1.416 | 1.366 | 1.464 | 0.9   |

$$RD = \Sigma[(|BL_{func.} - BL_{exp.}|) / BL_{exp.}] / n.$$

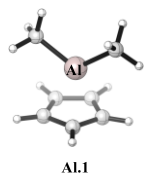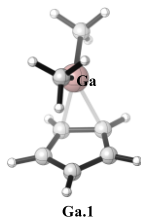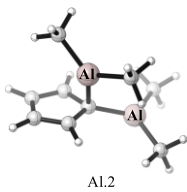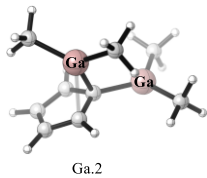

**Figure S3.** The distorted structures of **Al.1**, **Al.2**, **Ga.1**, **Ga.2**.

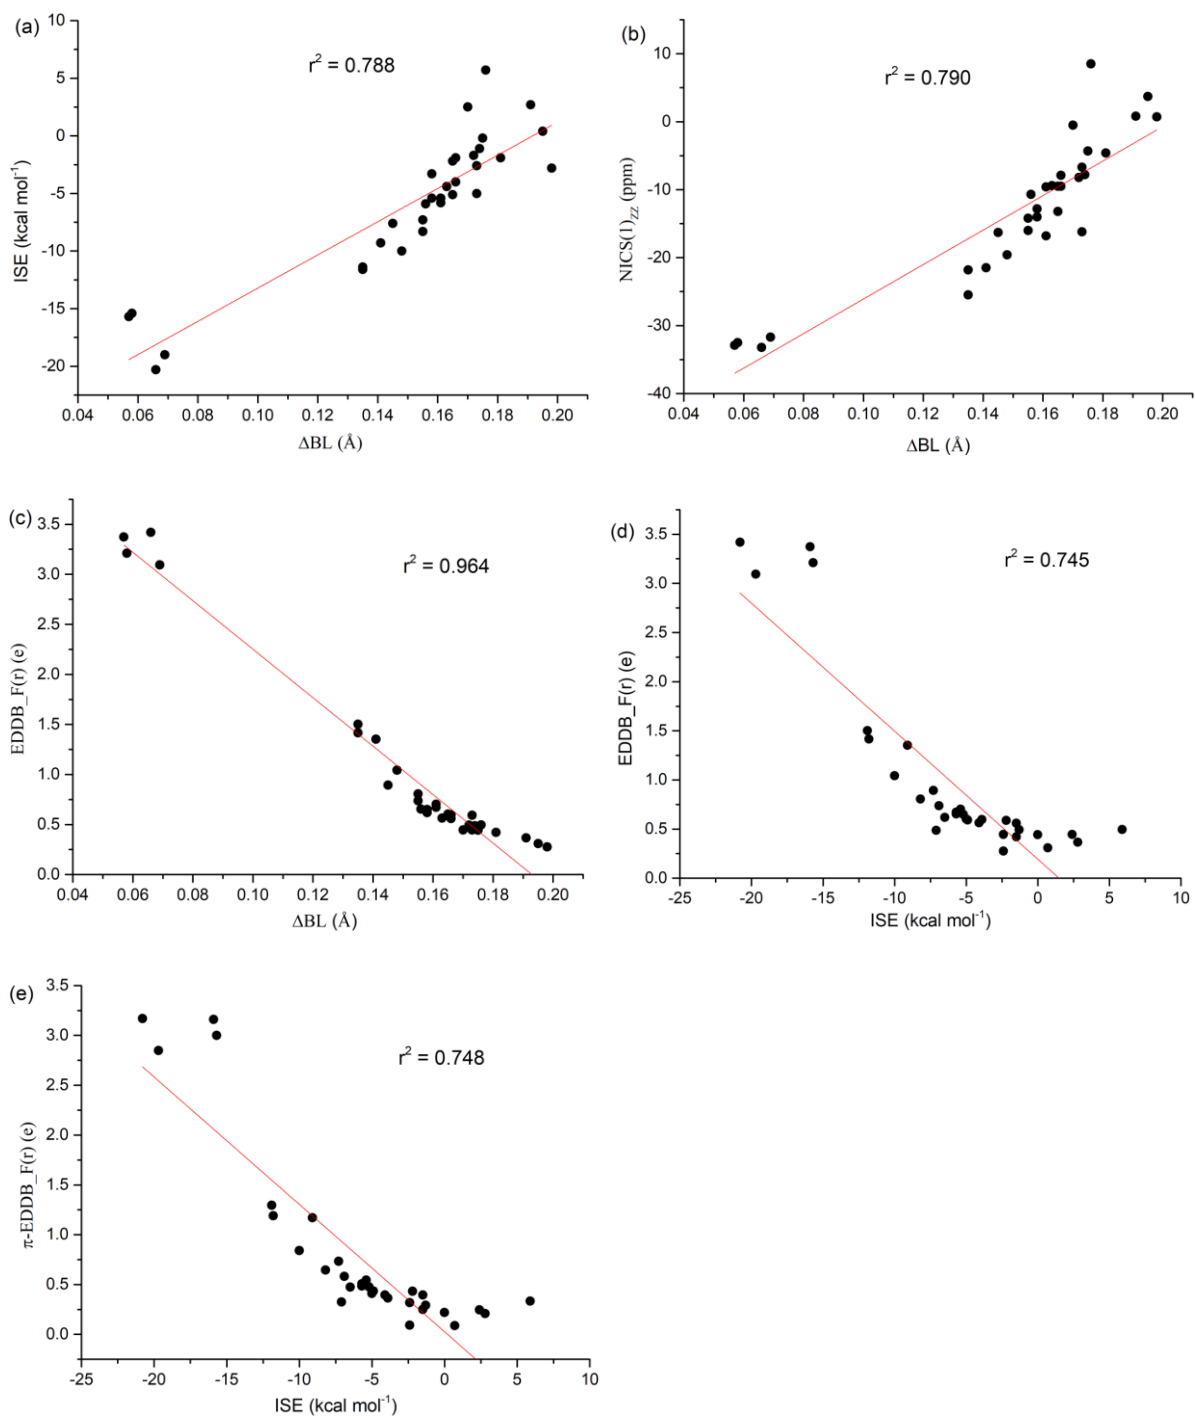

**Figure S4.** Correlation between (a)  $\Delta\text{BL}$  vs. ISE, (b)  $\Delta\text{BL}$  vs. NICS(1)<sub>zz</sub>, (c)  $\Delta\text{BL}$  vs. EDDB\_F(r), (d) ISE vs. EDDB\_F(r), and (e) ISE vs.  $\pi$ -EDDB\_F(r) values for all the cyclopentadiene derivatives.

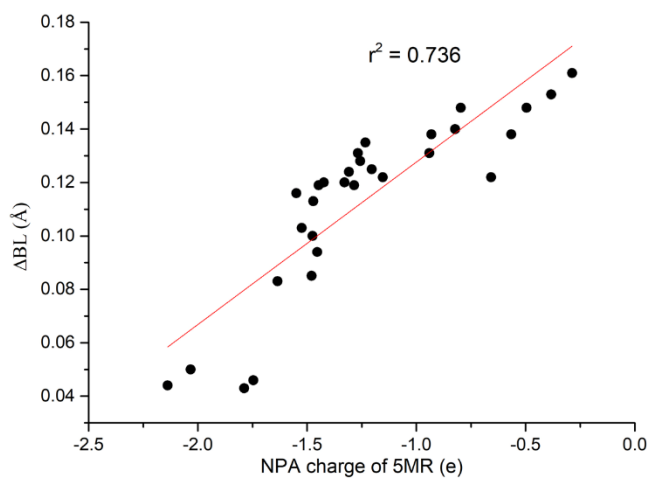

**Figure S5.** Correlation between NPA charge of 5 carbon atoms in 5MR vs.  $\Delta BL$  for all the cyclopentadiene derivatives (1-R, 2-R and 3-R) considered here.

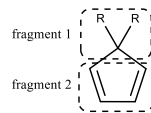

**B.2** Total interaction: 2.60

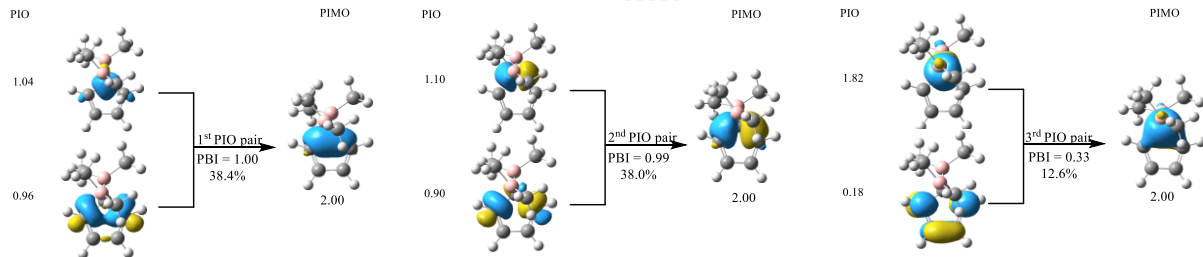

**N\*.2** Total interaction: 2.30

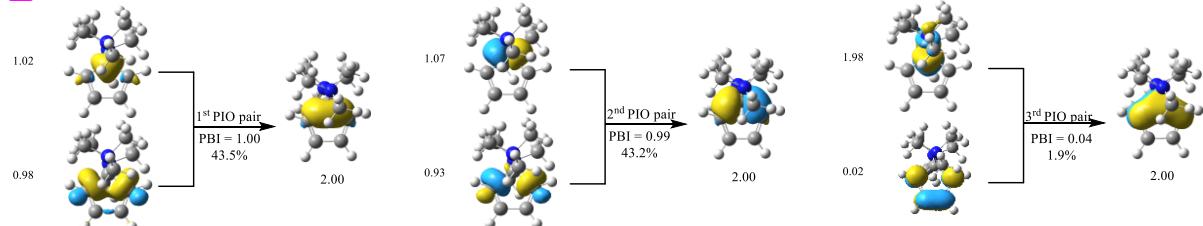

**P\*.2** Total interaction: 2.31

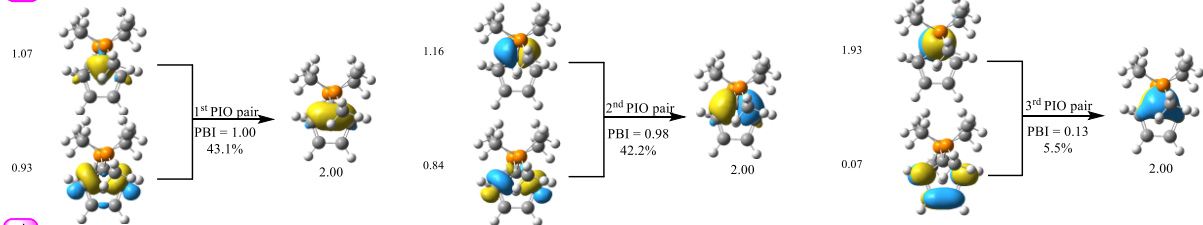

**As\*.2** Total interaction: 2.36

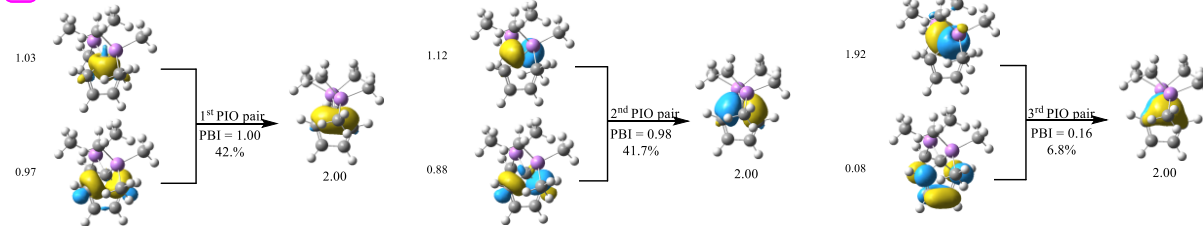

**N.2** Total interaction: 2.23

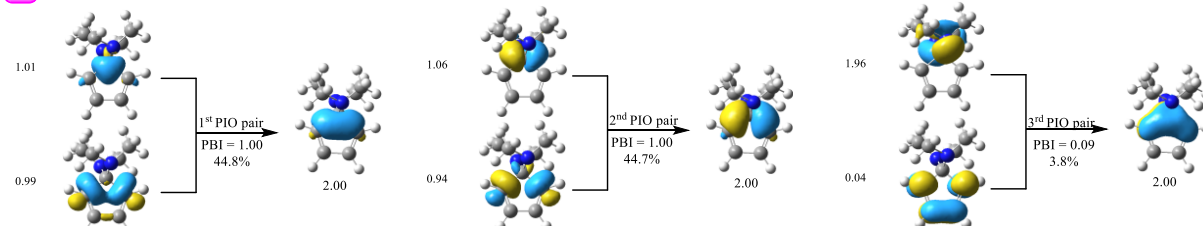

**P.2** Total interaction: 2.39

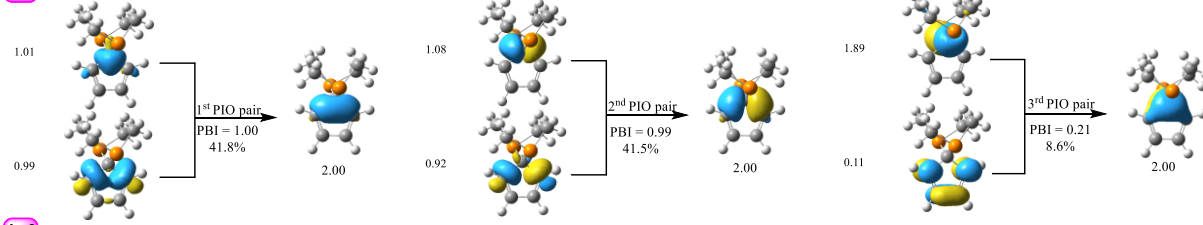

**As.2** Total interaction: 2.46

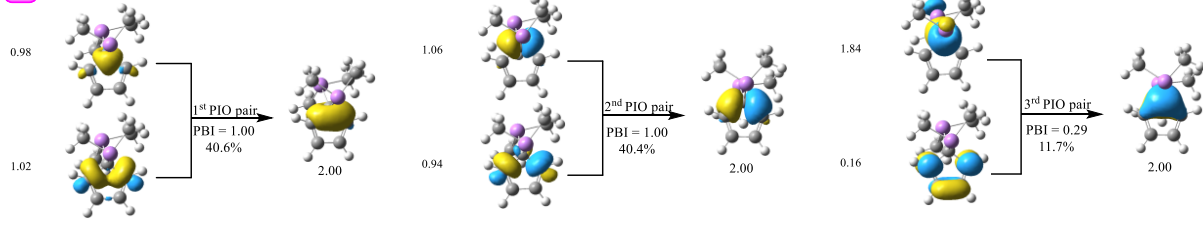

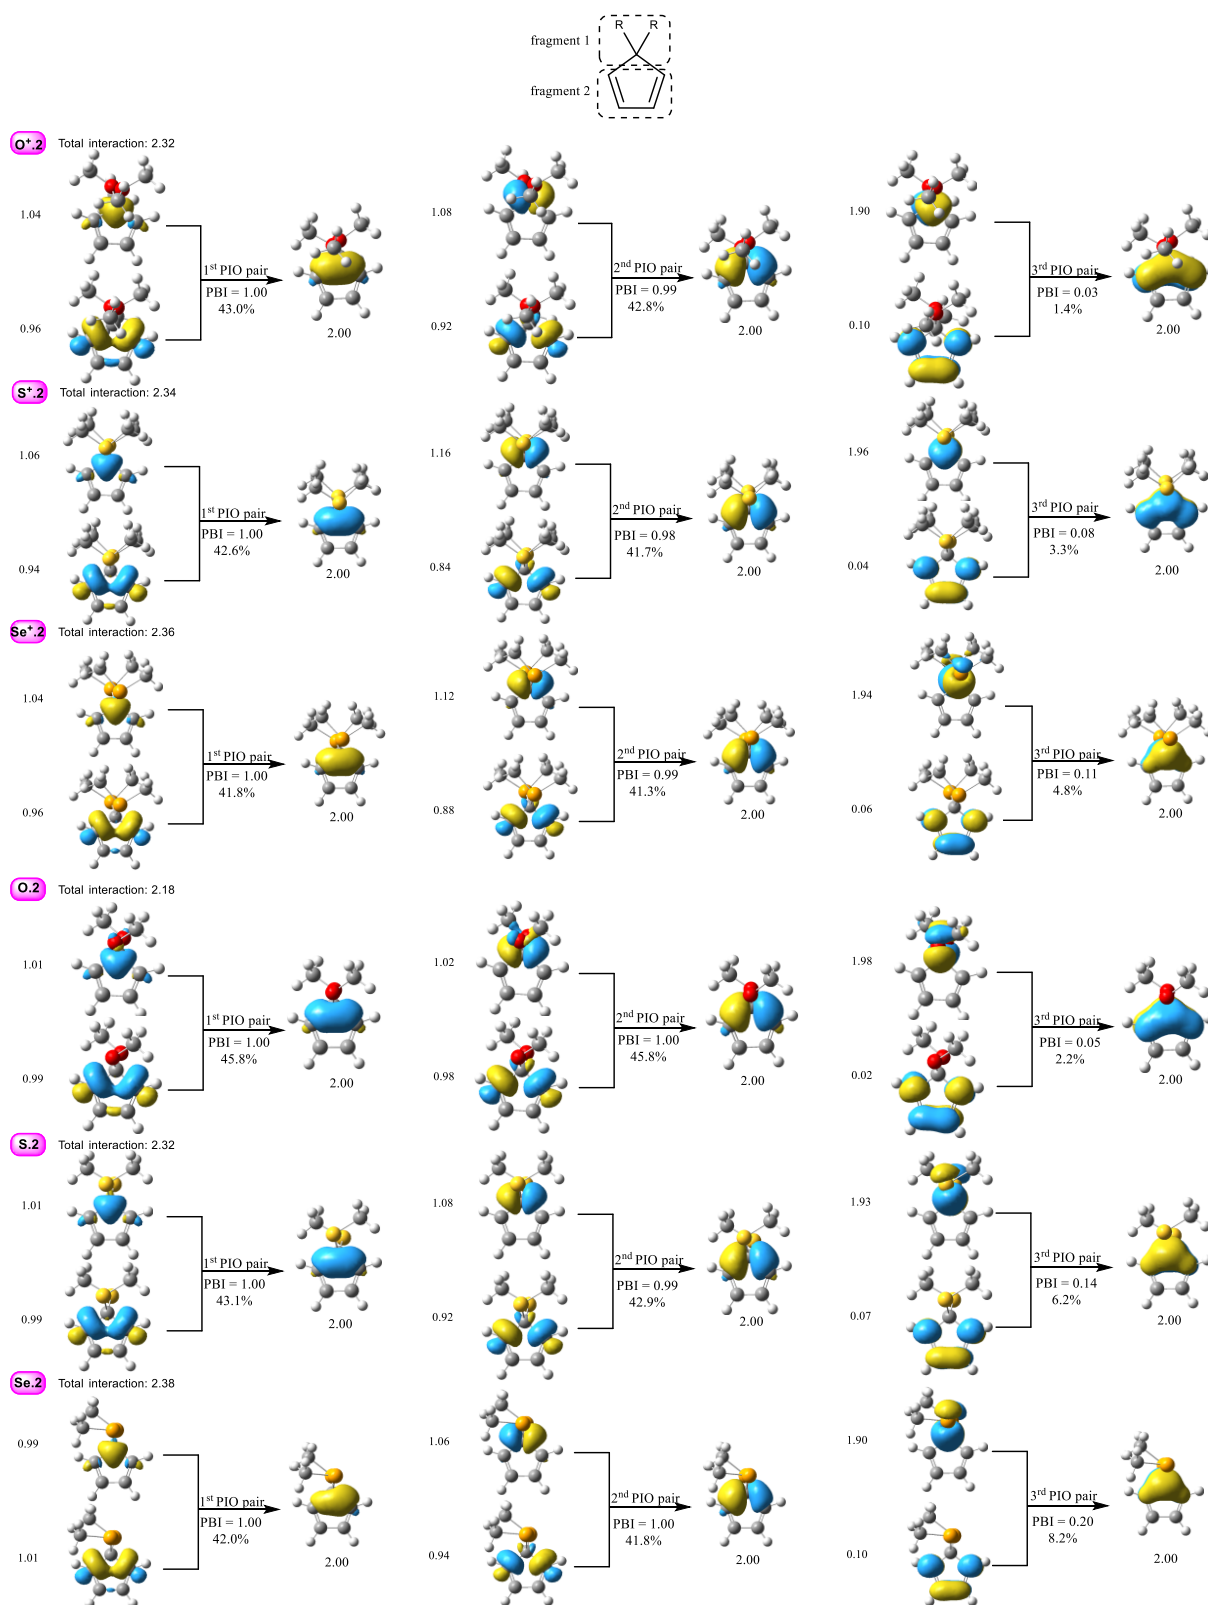

**Figure S6.** PIO analysis for the interaction of two fragments in **B.2**, **N<sup>+.2</sup>**, **P<sup>+.2</sup>**, **As<sup>+.2</sup>**, **N.2**, **P.2**, **As.2**, **O<sup>+.2</sup>**, **S<sup>+.2</sup>**, **Se<sup>+.2</sup>**, **O.2**, **S.2**, **Se.2**. PIO pairs, populations (Pop), PBI, and contribution (%) of each interaction are shown in blue and red (isovalue: 0.05 a.u.).

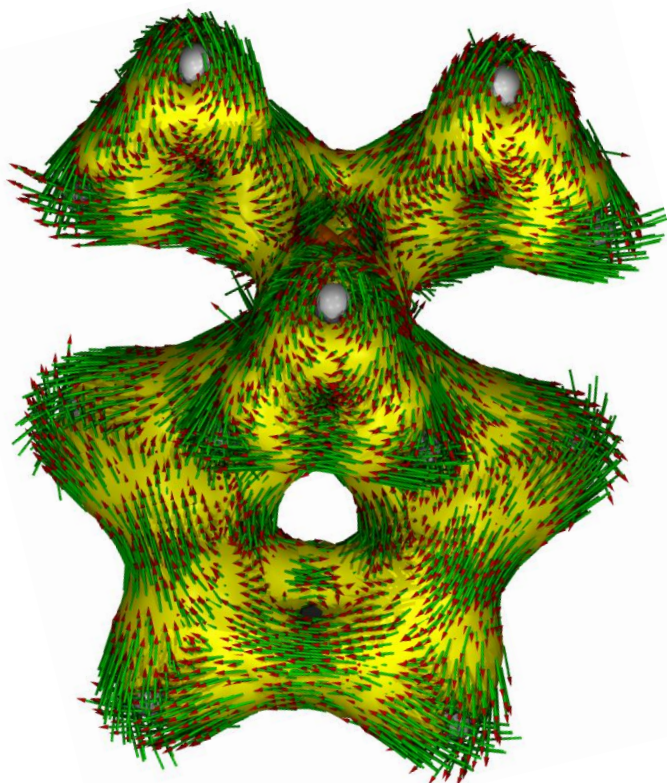

**Figure S7.** ACID plot of **B:1**. Isovalue: 0.030 a.u



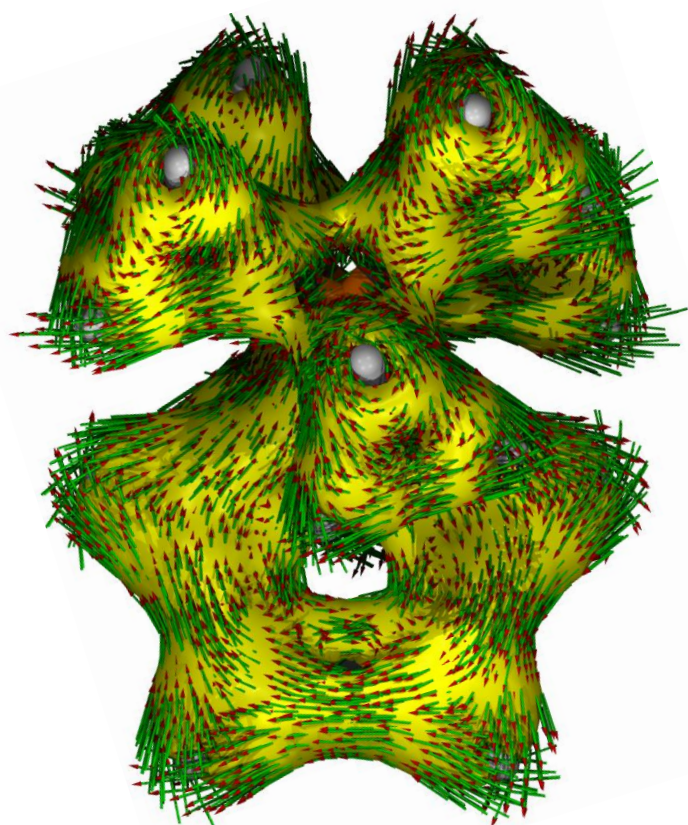

Figure S8. ACID plot of **B:2**. Isovalue: 0.030 a.u

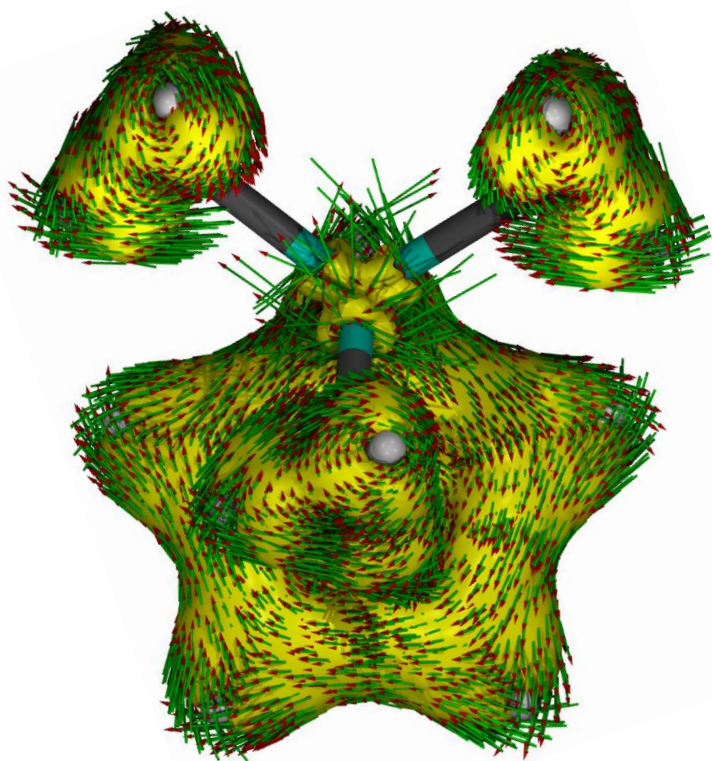

**Figure S9.** ACID plot of AlF.1. Isovalue: 0.030 a.u

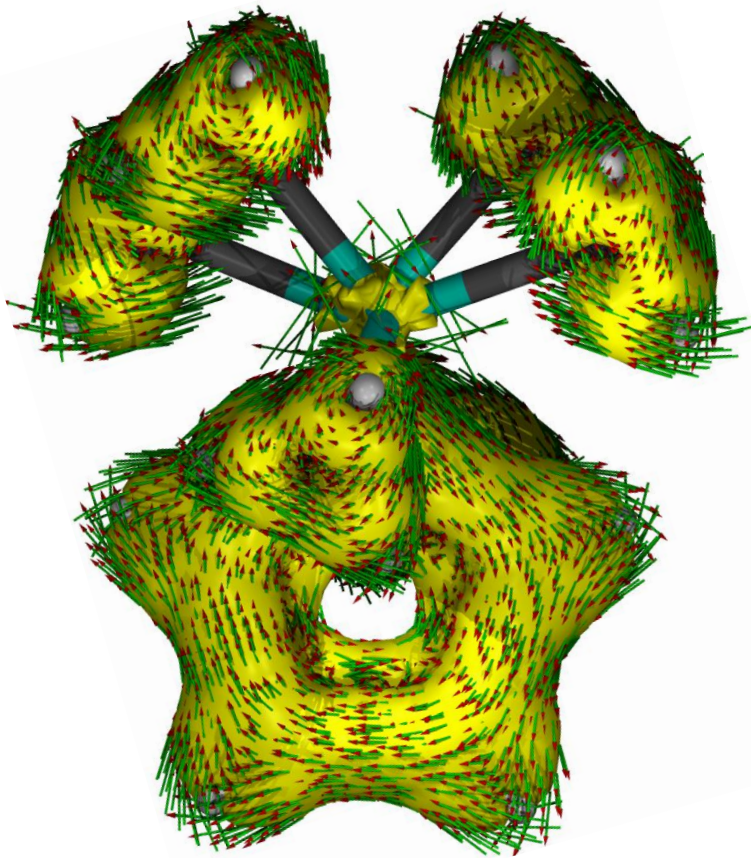

**Figure S10.** ACID plot of Al-2. Isovalue: 0.030 a.u.

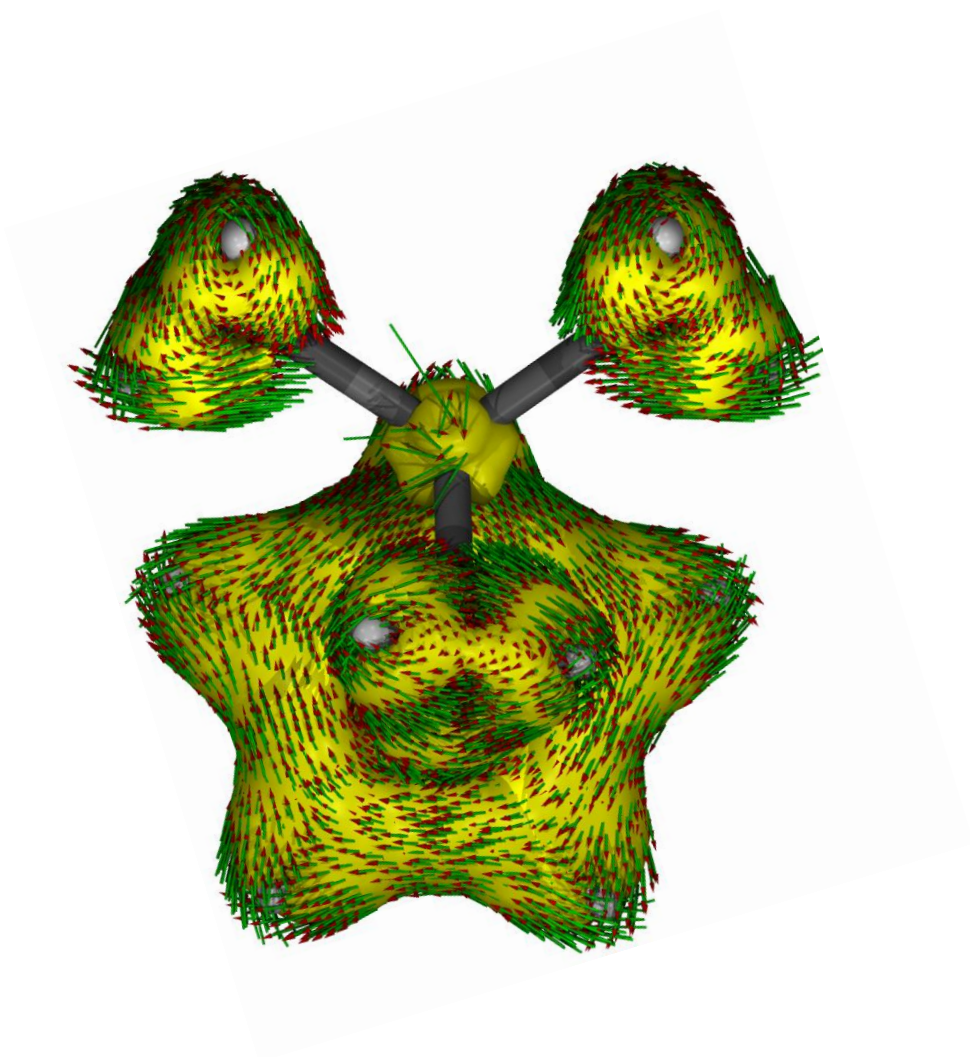

Figure S11. ACID plot of Ga·1. Isovalue: 0.030 a.u.

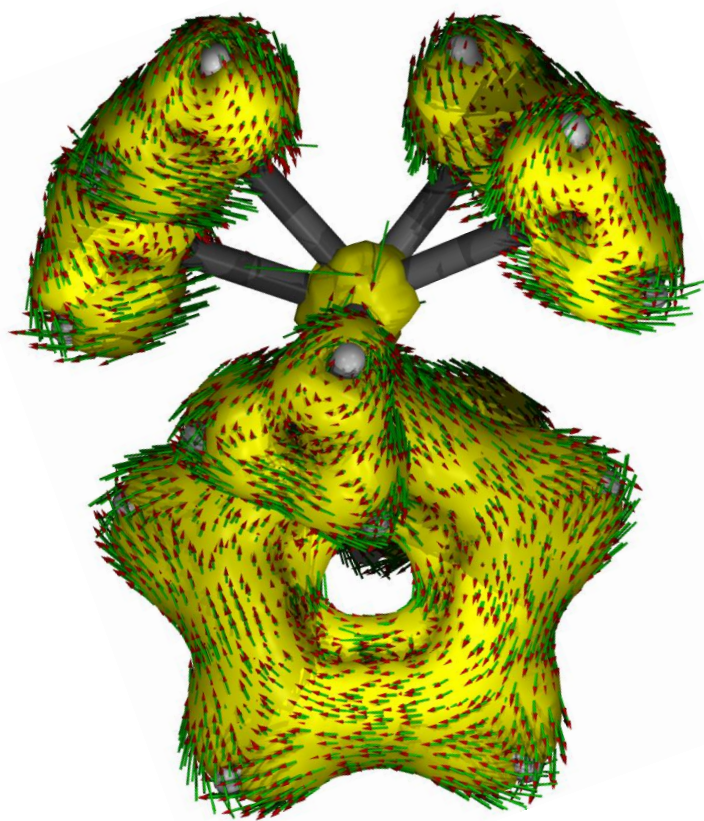

**Figure S12.** ACID plot of Ga·2. Isovalue: 0.030 a.u.

## Cartesian coordinates and electronic energies of the species in this study

**CPD** Energy = -194.104500 a.u.

|   |             |             |             |
|---|-------------|-------------|-------------|
| C | -0.00036400 | -1.21070700 | -0.00021000 |
| H | -0.00056700 | -1.86794200 | -0.87685400 |
| H | -0.00055900 | -1.86854700 | 0.87595800  |
| C | 1.17244500  | -0.28001500 | 0.00022000  |
| H | 2.20218400  | -0.60592600 | 0.00032600  |
| C | 0.73255500  | 0.98466000  | -0.00006500 |
| H | 1.34725300  | 1.87394600  | -0.00014700 |
| C | -1.17261200 | -0.27931300 | 0.00023300  |
| H | -2.20254700 | -0.60460300 | 0.00035000  |
| C | -0.73196300 | 0.98509600  | -0.00008600 |
| H | -1.34612700 | 1.87475200  | -0.00018000 |

**B.1** Energy = -298.210040 a.u.

|   |             |             |             |
|---|-------------|-------------|-------------|
| C | 0.08163400  | -0.48837000 | 0.73094300  |
| H | -0.21366800 | -1.16938200 | 1.53199600  |
| C | 0.63977100  | -1.16167700 | -0.48277800 |
| H | 0.16201700  | -1.97902100 | -1.00325900 |
| C | 1.79246800  | -0.55051300 | -0.82856200 |
| H | 2.40132600  | -0.79110900 | -1.68898400 |
| C | 1.12839200  | 0.49523400  | 1.07983900  |
| H | 1.06912100  | 1.16357600  | 1.92678200  |
| C | 2.10087500  | 0.47481800  | 0.14629100  |
| H | 2.96551500  | 1.12250700  | 0.11061500  |
| B | -1.22269900 | 0.14419000  | 0.04061300  |
| C | -2.56102500 | -0.67284800 | 0.15205700  |
| H | -3.05526100 | -0.34776900 | 1.07787800  |
| H | -3.26561300 | -0.48359900 | -0.65958500 |
| H | -2.40930100 | -1.75001700 | 0.25442500  |
| C | -1.17858800 | 1.53571800  | -0.67760200 |
| H | -1.52549800 | 2.28925200  | 0.04202500  |
| H | -0.17715300 | 1.83879700  | -0.98650700 |
| H | -1.85915400 | 1.59164800  | -1.52956800 |

**B.2** Energy = -402.318970 a.u.

|   |             |             |             |
|---|-------------|-------------|-------------|
| C | -0.06765600 | -0.28585000 | 0.05058800  |
| C | -0.94213900 | -0.90380000 | 1.06116500  |
| H | -0.71991200 | -0.92658400 | 2.11808100  |
| C | -2.06142600 | -1.38639300 | 0.47111100  |
| H | -2.88713300 | -1.87117300 | 0.97224000  |
| C | -0.81921800 | -0.49200000 | -1.21795800 |
| H | -0.47018500 | -0.19942200 | -2.19739800 |
| C | -1.99339000 | -1.11339400 | -0.93840900 |
| H | -2.74917500 | -1.38523200 | -1.66227600 |
| B | 1.47177200  | -0.57996500 | 0.17654900  |

|   |             |             |             |
|---|-------------|-------------|-------------|
| B | -0.25562500 | 1.32208200  | -0.05397900 |
| C | -1.41734900 | 2.03883000  | 0.71789100  |
| H | -1.69521000 | 2.99658200  | 0.27394700  |
| H | -2.30573300 | 1.41550700  | 0.83177500  |
| H | -1.06129400 | 2.25122200  | 1.73424900  |
| C | 0.79326900  | 2.18642900  | -0.85281700 |
| H | 0.31119800  | 3.00639600  | -1.39024200 |
| H | 1.45424300  | 2.66238500  | -0.11631900 |
| H | 1.43153900  | 1.64015800  | -1.54787600 |
| C | 2.18387600  | -0.40699500 | 1.56855200  |
| H | 2.74568300  | -1.30973400 | 1.82846400  |
| H | 2.93843100  | 0.38295700  | 1.47332400  |
| H | 1.53272300  | -0.15146700 | 2.40535300  |
| C | 2.30795400  | -1.05862100 | -1.06274100 |
| H | 3.38678400  | -0.93680700 | -0.95044800 |
| H | 2.11230700  | -2.13557600 | -1.16001600 |
| H | 1.99146900  | -0.61903300 | -2.01000200 |

**Al.1** Energy = -515.813810 a.u.

|    |             |             |             |
|----|-------------|-------------|-------------|
| C  | -1.14756400 | -1.28736200 | 0.00090600  |
| H  | -1.01049800 | -2.35623800 | 0.00171400  |
| C  | -1.19067200 | -0.45756900 | 1.14190100  |
| H  | -1.16296600 | -0.78939500 | 2.16831200  |
| C  | -1.35002300 | 0.88311200  | 0.69860000  |
| H  | -1.39424200 | 1.75533300  | 1.33117200  |
| C  | -1.19063200 | -0.45928800 | -1.14131000 |
| H  | -1.16282600 | -0.79264100 | -2.16722300 |
| C  | -1.34992300 | 0.88207500  | -0.70002500 |
| H  | -1.39415400 | 1.75334800  | -1.33390600 |
| Al | 0.71191000  | 0.01971900  | -0.00001100 |
| C  | 1.64354000  | 1.75529100  | -0.00002600 |
| H  | 2.72875300  | 1.62264300  | -0.00065700 |
| H  | 1.38281100  | 2.35693800  | -0.87584100 |
| H  | 1.38379900  | 2.35630200  | 0.87652700  |
| C  | 2.00065800  | -1.46871600 | -0.00002300 |
| H  | 2.65647200  | -1.38837500 | -0.87410800 |
| H  | 2.65647000  | -1.38841700 | 0.87406800  |
| H  | 1.56924000  | -2.47109900 | -0.00004900 |

**Al.2** Energy = -837.512938 a.u.

|   |             |            |             |
|---|-------------|------------|-------------|
| C | -0.00965000 | 0.70610400 | -0.17813500 |
| C | -0.80093900 | 1.62593100 | 0.57456300  |
| H | -0.53593900 | 1.99558000 | 1.55597400  |
| C | -1.96908500 | 1.93587300 | -0.11120600 |
| H | -2.75784300 | 2.58427400 | 0.24024700  |
| C | -0.81657600 | 0.42974400 | -1.37351000 |

|    |             |             |             |
|----|-------------|-------------|-------------|
| H  | -0.46427100 | -0.09829800 | -2.25112100 |
| C  | -1.98663500 | 1.19737500  | -1.29981600 |
| H  | -2.77288100 | 1.20983900  | -2.04131700 |
| Al | -1.02252900 | -1.06735000 | 0.16044500  |
| C  | -2.64177400 | -1.20435100 | 1.23343500  |
| H  | -3.22983700 | -0.28703500 | 1.24555100  |
| H  | -3.27740400 | -2.01290300 | 0.86073700  |
| H  | -2.39124200 | -1.45565100 | 2.26868700  |
| C  | 0.11636800  | -2.64141600 | -0.13272200 |
| H  | -0.47862800 | -3.53933200 | -0.32281600 |
| H  | 0.81027200  | -2.52561900 | -0.96985500 |
| H  | 0.71962900  | -2.86210400 | 0.75606800  |
| Al | 1.88614700  | 0.37525000  | 0.05998700  |
| C  | 2.91758800  | -0.41078100 | -1.39831600 |
| H  | 2.31183600  | -0.60888200 | -2.28537700 |
| H  | 3.74328300  | 0.23984600  | -1.70229400 |
| H  | 3.36926800  | -1.35879300 | -1.08966600 |
| C  | 2.70241000  | 0.84542400  | 1.77026900  |
| H  | 3.17795000  | -0.02636400 | 2.23073500  |
| H  | 3.49282500  | 1.59141100  | 1.64199400  |
| H  | 1.98570600  | 1.24790100  | 2.48945500  |

**Ga.1** Energy = -2198.282439 a.u.

|    |             |             |             |
|----|-------------|-------------|-------------|
| C  | 0.84000200  | -1.10941200 | 0.72700600  |
| C  | 0.83988300  | -1.11013400 | -0.72612300 |
| H  | 0.37931300  | -1.86419200 | -1.34929400 |
| C  | 1.80318600  | -0.16612600 | -1.13405100 |
| H  | 2.02761800  | 0.08733600  | -2.15959200 |
| C  | 1.80330500  | -0.16494100 | 1.13387000  |
| H  | 2.02788200  | 0.08962000  | 2.15910400  |
| C  | 2.38681700  | 0.40112400  | -0.00041700 |
| H  | 3.11949700  | 1.19422000  | -0.00084100 |
| Ga | -0.80387200 | 0.12451800  | 0.00015500  |
| C  | -0.61290900 | 2.07573300  | -0.00047600 |
| H  | -1.10248500 | 2.49550500  | 0.88052600  |
| H  | -1.10327000 | 2.49493200  | -0.88131200 |
| H  | 0.43185600  | 2.37931200  | -0.00099400 |
| C  | -2.50818300 | -0.87388400 | -0.00021400 |
| H  | -3.10389800 | -0.61829300 | 0.87903300  |
| H  | -2.34482100 | -1.95221600 | -0.00044900 |
| H  | -3.10346100 | -0.61780300 | -0.87961500 |
| H  | 0.37918700  | -1.86263100 | 1.35105400  |

**Ga.2** Energy = -4202.452193 a.u.

|   |             |            |             |
|---|-------------|------------|-------------|
| C | -0.00806400 | 0.79505800 | -0.22536100 |
| C | -0.83915600 | 0.61535300 | -1.42079400 |



|    |             |             |             |
|----|-------------|-------------|-------------|
| H  | -0.59038800 | -0.02227200 | -2.25971700 |
| C  | -1.82734400 | 1.60448700  | -1.41557500 |
| H  | -2.58612100 | 1.73403300  | -2.17415600 |
| C  | -0.58931500 | 1.90833600  | 0.45293700  |
| H  | -0.25080500 | 2.28417900  | 1.40877200  |
| C  | -1.66462400 | 2.39964100  | -0.27211700 |
| H  | -2.30245500 | 3.22163500  | 0.01827300  |
| Ga | 1.83108500  | 0.18580700  | 0.02814800  |
| Ga | -1.30545900 | -0.83262100 | 0.18719900  |
| C  | 2.79231500  | 0.78674300  | 1.64103100  |
| H  | 3.45717500  | 1.61657500  | 1.38612500  |
| H  | 3.41542000  | -0.00877900 | 2.05375400  |
| H  | 2.11091200  | 1.13639700  | 2.41753700  |
| C  | 2.65107600  | -0.99778300 | -1.31805700 |
| H  | 3.65170400  | -0.65482900 | -1.58870800 |
| H  | 2.05074400  | -1.06626700 | -2.22586400 |
| H  | 2.75684100  | -2.00552300 | -0.90725800 |
| C  | -2.91060400 | -0.49930300 | 1.26446400  |
| H  | -2.71053400 | -0.73134100 | 2.31266200  |
| H  | -3.72604400 | -1.14465000 | 0.93297900  |
| H  | -3.22745000 | 0.53962100  | 1.19304100  |
| C  | -0.49501200 | -2.60669300 | -0.14658400 |
| H  | 0.11842800  | -2.91117700 | 0.70644000  |
| H  | 0.14507400  | -2.60030900 | -1.02979400 |
| H  | -1.26255800 | -3.37110800 | -0.27948500 |

**B:1** Energy = -338.175464 a.u.

|   |             |             |             |
|---|-------------|-------------|-------------|
| C | 0.33823300  | -0.00012400 | -0.78491600 |
| H | -0.03976400 | -0.00016600 | -1.81123900 |
| C | 1.17808900  | 1.15099400  | -0.42806800 |
| H | 0.88190700  | 2.18189000  | -0.56818300 |
| C | 2.30811700  | 0.72468800  | 0.18635100  |
| H | 3.07068300  | 1.35012000  | 0.63489500  |
| C | 1.17834600  | -1.15102100 | -0.42813300 |
| H | 0.88270600  | -2.18201200 | -0.56872300 |
| C | 2.30829800  | -0.72450300 | 0.18628900  |
| H | 3.07115500  | -1.34980700 | 0.63451200  |
| B | -1.18601800 | -0.00002400 | 0.08203600  |
| C | -2.00705200 | -1.34218300 | -0.38686000 |
| H | -3.01561700 | -1.34581100 | 0.04984300  |
| H | -2.13609900 | -1.40254100 | -1.47713700 |
| H | -1.52353200 | -2.27454400 | -0.06775800 |
| C | -2.00617800 | 1.34311100  | -0.38568700 |
| H | -2.13482300 | 1.40473300  | -1.47593700 |
| H | -3.01490000 | 1.34671200  | 0.05068100  |

|   |             |             |             |
|---|-------------|-------------|-------------|
| H | -1.52240600 | 2.27494500  | -0.06541500 |
| C | -0.94685900 | -0.00092600 | 1.69796300  |
| H | -1.91118700 | -0.00028400 | 2.22617300  |
| H | -0.39287000 | -0.88259000 | 2.04277500  |
| H | -0.39113500 | 0.87925700  | 2.04369800  |

**B-.2** Energy = -482.107021 a.u.

|   |             |             |             |
|---|-------------|-------------|-------------|
| C | 0.00000000  | 0.00000000  | 0.30126000  |
| C | -1.13450500 | -0.01176300 | 1.23463200  |
| H | -2.16863500 | -0.00890400 | 0.90870500  |
| C | -0.72320600 | -0.00756100 | 2.53166200  |
| H | -1.35762300 | -0.00331800 | 3.41426400  |
| C | 1.13450500  | 0.01176300  | 1.23463200  |
| H | 2.16863500  | 0.00890400  | 0.90870500  |
| C | 0.72320600  | 0.00756100  | 2.53166200  |
| H | 1.35762300  | 0.00331800  | 3.41426400  |
| B | 0.00000000  | 1.49061800  | -0.61000100 |
| B | 0.00000000  | -1.49061800 | -0.61000100 |
| C | -1.09274100 | 1.48477000  | -1.84441900 |
| H | -1.12731700 | 2.48602900  | -2.30659300 |
| H | -0.85024300 | 0.76802100  | -2.63771700 |
| H | -2.11169200 | 1.25446500  | -1.50349300 |
| C | 1.49865900  | 1.83322800  | -1.22394800 |
| H | 1.43809900  | 2.73511800  | -1.85623600 |
| H | 2.22659500  | 2.05296400  | -0.42970200 |
| H | 1.92232300  | 1.03426100  | -1.84068700 |
| C | -0.39796500 | 2.75481200  | 0.38855400  |
| H | 0.17652700  | 2.74058400  | 1.32477800  |
| H | -0.19178000 | 3.71614000  | -0.11266700 |
| H | -1.46116700 | 2.75684800  | 0.66668700  |
| C | -1.49865900 | -1.83322800 | -1.22394800 |
| H | -1.92232300 | -1.03426100 | -1.84068700 |
| H | -1.43809900 | -2.73511800 | -1.85623600 |
| H | -2.22659500 | -2.05296400 | -0.42970200 |
| C | 0.39796500  | -2.75481200 | 0.38855400  |
| H | 0.19178000  | -3.71614000 | -0.11266700 |
| H | 1.46116700  | -2.75684800 | 0.66668700  |
| H | -0.17652700 | -2.74058400 | 1.32477800  |
| C | 1.09274100  | -1.48477000 | -1.84441900 |
| H | 0.85024300  | -0.76802100 | -2.63771700 |
| H | 2.11169200  | -1.25446500 | -1.50349300 |
| H | 1.12731700  | -2.48602900 | -2.30659300 |

**Al.1** Energy = -555.785889 a.u.

|   |             |            |             |
|---|-------------|------------|-------------|
| C | -0.69951800 | 0.01935600 | -1.09827100 |
| H | -0.13835500 | 0.03186300 | -2.02828900 |

|    |             |             |             |
|----|-------------|-------------|-------------|
| C  | -1.38478900 | -1.13927400 | -0.59894600 |
| H  | -1.11256700 | -2.16348000 | -0.81351900 |
| C  | -2.39545000 | -0.71819200 | 0.23979300  |
| H  | -3.03269800 | -1.35843900 | 0.83572100  |
| C  | -1.40671600 | 1.15642100  | -0.58242900 |
| H  | -1.15336900 | 2.18845500  | -0.78156400 |
| C  | -2.40968900 | 0.70378400  | 0.24911900  |
| H  | -3.06177500 | 1.32311000  | 0.85136700  |
| Al | 1.09102400  | -0.00221300 | 0.13517800  |
| C  | 2.13309000  | -1.55985900 | -0.59429100 |
| H  | 2.28669300  | -1.48808900 | -1.67832900 |
| H  | 3.12917100  | -1.62152700 | -0.13720800 |
| H  | 1.63257700  | -2.51602800 | -0.40116200 |
| C  | 2.01193600  | 1.72709000  | -0.31455200 |
| H  | 3.03888000  | 1.74735800  | 0.07261600  |
| H  | 2.07813600  | 1.89291200  | -1.39718200 |
| H  | 1.48928300  | 2.59092300  | 0.11250600  |
| C  | 0.64885600  | -0.18195700 | 2.07067100  |
| H  | 0.49091900  | -1.22555800 | 2.36305100  |
| H  | 1.45157000  | 0.21905200  | 2.70261800  |
| H  | -0.26809700 | 0.36400600  | 2.31550500  |

**Al-2** Energy = -917.346859 a.u.

|    |             |             |             |
|----|-------------|-------------|-------------|
| C  | 0.00000000  | 0.00000000  | 0.63102000  |
| C  | 1.13218700  | -0.05440800 | 1.52960400  |
| H  | 2.16484300  | -0.10476500 | 1.20248100  |
| C  | 0.71108800  | -0.03473800 | 2.84415100  |
| H  | 1.34643400  | -0.06209800 | 3.72389800  |
| C  | -1.13218700 | 0.05440800  | 1.52960400  |
| H  | -2.16484300 | 0.10476500  | 1.20248100  |
| C  | -0.71108800 | 0.03473800  | 2.84415100  |
| H  | -1.34643400 | 0.06209800  | 3.72389800  |
| Al | 0.00000000  | 1.68046200  | -0.55631100 |
| C  | 1.30119500  | 1.56013500  | -2.10543300 |
| H  | 1.03590200  | 0.77210400  | -2.81984400 |
| H  | 1.32288400  | 2.51335800  | -2.65419700 |
| H  | 2.32506500  | 1.35514700  | -1.76730000 |
| C  | -1.86330600 | 2.03762500  | -1.27337900 |
| H  | -1.85813800 | 2.89676000  | -1.96023100 |
| H  | -2.27575500 | 1.18171900  | -1.81945900 |
| H  | -2.56000500 | 2.27686600  | -0.45902000 |
| C  | 0.54020000  | 3.27348500  | 0.58139800  |
| H  | 1.61975700  | 3.28677100  | 0.77977900  |
| H  | 0.28031800  | 4.22803400  | 0.10002400  |
| H  | 0.03478200  | 3.23994900  | 1.55480500  |

|    |             |             |             |
|----|-------------|-------------|-------------|
| Al | 0.00000000  | -1.68046200 | -0.55631100 |
| C  | 1.86330600  | -2.03762500 | -1.27337900 |
| H  | 1.85813800  | -2.89676000 | -1.96023100 |
| H  | 2.27575500  | -1.18171900 | -1.81945900 |
| H  | 2.56000500  | -2.27686600 | -0.45902000 |
| C  | -1.30119500 | -1.56013500 | -2.10543300 |
| H  | -1.32288400 | -2.51335800 | -2.65419700 |
| H  | -2.32506500 | -1.35514700 | -1.76730000 |
| H  | -1.03590200 | -0.77210400 | -2.81984400 |
| C  | -0.54020000 | -3.27348500 | 0.58139800  |
| H  | -0.28031800 | -4.22803400 | 0.10002400  |
| H  | -0.03478200 | -3.23994900 | 1.55480500  |
| H  | -1.61975700 | -3.28677100 | 0.77977900  |

**Ga.1** Energy = -2238.249249 a.u.

|    |             |             |             |
|----|-------------|-------------|-------------|
| C  | 0.94264900  | 0.00864100  | -1.10481900 |
| H  | 0.39740900  | 0.01351100  | -2.04340600 |
| C  | 1.64589100  | 1.15168300  | -0.59505500 |
| H  | 1.38784000  | 2.18150000  | -0.80071200 |
| C  | 2.65001900  | 0.70986600  | 0.23926300  |
| H  | 3.30031700  | 1.33561000  | 0.83702900  |
| C  | 1.63570200  | -1.14348600 | -0.59998800 |
| H  | 1.36855300  | -2.17011500 | -0.81015900 |
| C  | 2.64348200  | -0.71452200 | 0.23643800  |
| H  | 3.28618900  | -1.34861000 | 0.83345000  |
| Ga | -0.92147100 | -0.00122900 | 0.11307300  |
| C  | -1.89742400 | -1.62500000 | -0.60643200 |
| H  | -1.37768800 | -2.55047700 | -0.33960000 |
| H  | -2.91261200 | -1.68593700 | -0.19762200 |
| H  | -1.98633300 | -1.59490000 | -1.69766100 |
| C  | -1.83052900 | 1.72037600  | -0.44801900 |
| H  | -1.87229600 | 1.81934900  | -1.53799200 |
| H  | -2.86103700 | 1.76018100  | -0.07651200 |
| H  | -1.30203600 | 2.59403300  | -0.05431100 |
| C  | -0.43498300 | -0.10113100 | 2.05849200  |
| H  | -1.00073300 | 0.62397900  | 2.65287400  |
| H  | -0.62064200 | -1.09698100 | 2.47192200  |
| H  | 0.62983800  | 0.11839200  | 2.17815900  |

**Ga.2** Energy = -4282.269992 a.u.

|   |             |            |             |
|---|-------------|------------|-------------|
| C | 0.00401200  | 0.78730500 | -0.00346300 |
| C | 0.09869500  | 1.68255400 | -1.13618200 |
| H | 0.13168900  | 1.35092700 | -2.16806000 |
| C | 0.14710400  | 2.99388500 | -0.71535500 |
| H | 0.22096800  | 3.87209700 | -1.34939100 |
| C | -0.00356600 | 1.68647300 | 1.13023600  |

|    |             |             |             |
|----|-------------|-------------|-------------|
| H  | -0.06781700 | 1.35818800  | 2.16169600  |
| C  | 0.08160000  | 2.99635400  | 0.71103800  |
| H  | 0.10291900  | 3.87647200  | 1.34633800  |
| Ga | 1.67786400  | -0.46531500 | 0.00814200  |
| Ga | -1.70733700 | -0.39865400 | -0.00813700 |
| C  | 2.00725400  | -1.19778200 | -1.87289700 |
| H  | 2.82975700  | -1.92591700 | -1.86441300 |
| H  | 1.12113800  | -1.69425500 | -2.27967900 |
| H  | 2.28582600  | -0.38734000 | -2.55683000 |
| C  | 1.49417100  | -2.01004100 | 1.33302500  |
| H  | 0.67698600  | -2.68579900 | 1.06149100  |
| H  | 2.42475700  | -2.59314700 | 1.36067600  |
| H  | 1.29708800  | -1.64546800 | 2.34750900  |
| C  | 3.29548100  | 0.67248700  | 0.54608300  |
| H  | 3.36773100  | 0.77719600  | 1.63512800  |
| H  | 4.23728600  | 0.23748600  | 0.18416000  |
| H  | 3.19487800  | 1.67820000  | 0.12312000  |
| C  | -1.58809100 | -1.97711500 | -1.30156800 |
| H  | -1.38120400 | -1.64289600 | -2.32461400 |
| H  | -0.79643500 | -2.67815800 | -1.01845400 |
| H  | -2.54053300 | -2.52434300 | -1.31378800 |
| C  | -2.07953700 | -1.08221500 | 1.88407200  |
| H  | -2.94543000 | -1.75820800 | 1.88663500  |
| H  | -1.22524300 | -1.62657800 | 2.29801200  |
| H  | -2.30647700 | -0.24676900 | 2.55696300  |
| C  | -3.28474200 | 0.78160600  | -0.57911500 |
| H  | -4.24809400 | 0.33137600  | -0.30201700 |
| H  | -3.21268600 | 1.76279200  | -0.09682600 |
| H  | -3.28775300 | 0.94612200  | -1.66307000 |

N<sup>+</sup>.1 Energy = -367.765694 a.u.

|   |             |             |             |
|---|-------------|-------------|-------------|
| C | -0.26503400 | -0.00006100 | -0.62422400 |
| H | -0.06909200 | -0.00009000 | -1.70217900 |
| C | -1.12981500 | -1.18336800 | -0.27021100 |
| H | -0.84787300 | -2.21480200 | -0.41364700 |
| C | -2.32349500 | -0.73544400 | 0.11930600  |
| H | -3.17747000 | -1.34690200 | 0.37126600  |
| C | -1.12970100 | 1.18330900  | -0.27018300 |
| H | -0.84753000 | 2.21470500  | -0.41342500 |
| C | -2.32349700 | 0.73550800  | 0.11911200  |
| H | -3.17742200 | 1.34703800  | 0.37106500  |
| N | 1.10525400  | -0.00002000 | 0.03467800  |
| C | 1.86879100  | -1.21062300 | -0.39257400 |
| H | 2.87071400  | -1.15541700 | 0.02644200  |
| H | 1.36960200  | -2.10137000 | -0.02464900 |

|   |            |             |             |
|---|------------|-------------|-------------|
| H | 1.92293500 | -1.23162900 | -1.47880800 |
| C | 1.86805300 | 1.21147900  | -0.39129400 |
| H | 1.92073000 | 1.23456800  | -1.47755900 |
| H | 1.36921600 | 2.10144700  | -0.02099400 |
| H | 2.87055100 | 1.15561800  | 0.02626600  |
| C | 0.97331300 | -0.00081000 | 1.52318000  |
| H | 0.42801200 | 0.88777300  | 1.82864200  |
| H | 0.42925800 | -0.89043100 | 1.82782500  |
| H | 1.96989100 | -0.00030600 | 1.95832900  |

N<sup>+</sup>.2 Energy = -541.263858 a.u.

|   |             |             |             |
|---|-------------|-------------|-------------|
| C | 0.00000000  | 0.00000000  | 0.24941100  |
| C | -0.92373000 | 0.74556000  | 1.19972000  |
| H | -1.74420400 | 1.37172600  | 0.88489200  |
| C | -0.57514800 | 0.46439300  | 2.45226700  |
| H | -1.05598300 | 0.84390800  | 3.34284700  |
| C | 0.92373000  | -0.74556000 | 1.19972000  |
| H | 1.74420400  | -1.37172600 | 0.88489200  |
| C | 0.57514800  | -0.46439300 | 2.45226700  |
| H | 1.05598300  | -0.84390800 | 3.34284700  |
| N | 0.82742900  | 1.04672400  | -0.58016700 |
| N | -0.82742900 | -1.04672400 | -0.58016700 |
| C | 0.00000000  | 2.16861700  | -1.15803100 |
| H | 0.67258100  | 2.80690800  | -1.72535000 |
| H | -0.76463100 | 1.79307700  | -1.82291200 |
| H | -0.44031900 | 2.74288600  | -0.34946000 |
| C | 1.80323000  | 1.72595600  | 0.36631000  |
| H | 2.58795600  | 1.03311900  | 0.64715900  |
| H | 2.23038500  | 2.56661000  | -0.17366200 |
| H | 1.26875800  | 2.08575700  | 1.23911100  |
| C | 1.66802700  | 0.46424700  | -1.67751500 |
| H | 2.26474200  | -0.35593800 | -1.28876300 |
| H | 1.04612500  | 0.14798600  | -2.50855400 |
| H | 2.33633400  | 1.24663900  | -2.02887200 |
| C | -1.66802700 | -0.46424700 | -1.67751500 |
| H | -2.33633400 | -1.24663900 | -2.02887200 |
| H | -2.26474200 | 0.35593800  | -1.28876300 |
| H | -1.04612500 | -0.14798600 | -2.50855400 |
| C | 0.00000000  | -2.16861700 | -1.15803100 |
| H | -0.67258100 | -2.80690800 | -1.72535000 |
| H | 0.76463100  | -1.79307700 | -1.82291200 |
| H | 0.44031900  | -2.74288600 | -0.34946000 |
| C | -1.80323000 | -1.72595600 | 0.36631000  |
| H | -2.58795600 | -1.03311900 | 0.64715900  |
| H | -2.23038500 | -2.56661000 | -0.17366200 |

|   |             |             |            |
|---|-------------|-------------|------------|
| H | -1.26875800 | -2.08575700 | 1.23911100 |
|---|-------------|-------------|------------|

**P<sup>+</sup>.1** Energy = -654.430846 a.u.

|   |             |             |             |
|---|-------------|-------------|-------------|
| C | 0.55297000  | 0.00002700  | -0.82966500 |
| H | 0.32874100  | 0.00000300  | -1.90259000 |
| C | 1.38462700  | 1.18001700  | -0.40957700 |
| H | 1.11328600  | 2.20905100  | -0.59083700 |
| C | 2.50157000  | 0.73044200  | 0.17594900  |
| H | 3.29902200  | 1.34399700  | 0.56896600  |
| C | 1.38457100  | -1.17999800 | -0.40951500 |
| H | 1.11316800  | -2.20903300 | -0.59068100 |
| C | 2.50154000  | -0.73044400 | 0.17597700  |
| H | 3.29895100  | -1.34401700 | 0.56904900  |
| P | -1.03656200 | 0.00000300  | 0.03896400  |
| C | -1.97485700 | 1.45555600  | -0.42504400 |
| H | -2.95197400 | 1.42957300  | 0.05826400  |
| H | -1.44609500 | 2.35449400  | -0.10974600 |
| H | -2.11321900 | 1.47933900  | -1.50626300 |
| C | -1.97524200 | -1.45498400 | -0.42604400 |
| H | -2.95246200 | -1.42898400 | 0.05705500  |
| H | -2.11336600 | -1.47810800 | -1.50730800 |
| H | -1.44683300 | -2.35426900 | -0.11114100 |
| C | -0.77620500 | -0.00060800 | 1.80955200  |
| H | -0.21677300 | -0.88934700 | 2.09863000  |
| H | -0.21469200 | 0.88674600  | 2.09888300  |
| H | -1.74317100 | 0.00046200  | 2.31346100  |

**P<sup>+</sup>.2** Energy = -1114.632652 a.u.

|   |             |             |             |
|---|-------------|-------------|-------------|
| C | 0.00000000  | 0.00000000  | 0.41113800  |
| C | 1.18075700  | -0.01598200 | 1.35803100  |
| H | 2.21250100  | -0.01929700 | 1.03811300  |
| C | 0.72821400  | -0.00895400 | 2.62017400  |
| H | 1.34329900  | -0.01313900 | 3.50897800  |
| C | -1.18075700 | 0.01598200  | 1.35803100  |
| H | -2.21250100 | 0.01929700  | 1.03811300  |
| C | -0.72821400 | 0.00895400  | 2.62017400  |
| H | -1.34329900 | 0.01313900  | 3.50897800  |
| P | 0.00000000  | 1.60111900  | -0.50833100 |
| P | 0.00000000  | -1.60111900 | -0.50833100 |
| C | 1.26978900  | 1.62881100  | -1.77348400 |
| H | 1.01686200  | 0.96594800  | -2.60111700 |
| H | 1.33523800  | 2.64672300  | -2.16375700 |
| H | 2.23971100  | 1.35810500  | -1.35573400 |
| C | 0.32643500  | 2.90660900  | 0.66980200  |
| H | 0.15027600  | 3.85856900  | 0.16447400  |
| H | -0.34858200 | 2.82658500  | 1.52137100  |

|   |             |             |             |
|---|-------------|-------------|-------------|
| H | 1.35904700  | 2.86882800  | 1.01218100  |
| C | -1.58892900 | 1.91190300  | -1.27689700 |
| H | -1.51579100 | 2.85388800  | -1.82478800 |
| H | -1.86395900 | 1.12711300  | -1.97890100 |
| H | -2.36148100 | 2.01367100  | -0.51502300 |
| C | 1.58892900  | -1.91190300 | -1.27689700 |
| H | 1.51579100  | -2.85388800 | -1.82478800 |
| H | 1.86395900  | -1.12711300 | -1.97890100 |
| H | 2.36148100  | -2.01367100 | -0.51502300 |
| C | -1.26978900 | -1.62881100 | -1.77348400 |
| H | -1.01686200 | -0.96594800 | -2.60111700 |
| H | -1.33523800 | -2.64672300 | -2.16375700 |
| H | -2.23971100 | -1.35810500 | -1.35573400 |
| C | -0.32643500 | -2.90660900 | 0.66980200  |
| H | -0.15027600 | -3.85856900 | 0.16447400  |
| H | 0.34858200  | -2.82658500 | 1.52137100  |
| H | -1.35904700 | -2.86882800 | 1.01218100  |

**As<sup>+</sup>.1** Energy = -2548.983234 a.u.

|    |             |             |             |
|----|-------------|-------------|-------------|
| C  | -0.83668600 | -0.00003200 | -0.91470000 |
| H  | -0.60067700 | -0.00004900 | -1.98234700 |
| C  | -1.64038300 | -1.17867300 | -0.45749000 |
| H  | -1.37966500 | -2.20712900 | -0.65795200 |
| C  | -2.72175800 | -0.73012600 | 0.19530200  |
| H  | -3.49375500 | -1.34365600 | 0.63621400  |
| C  | -1.64019300 | 1.17873100  | -0.45735400 |
| H  | -1.37928800 | 2.20717100  | -0.65764900 |
| C  | -2.72164100 | 0.73027800  | 0.19538100  |
| H  | -3.49349400 | 1.34388400  | 0.63644100  |
| As | 0.85818000  | 0.00001500  | 0.03018200  |
| C  | 1.86685600  | -1.55730000 | -0.45031700 |
| H  | 2.83264700  | -1.52571700 | 0.05204100  |
| H  | 1.32188400  | -2.44690600 | -0.13990400 |
| H  | 2.01622900  | -1.57337200 | -1.52877100 |
| C  | 1.86626300  | 1.55809200  | -0.44908900 |
| H  | 2.83239800  | 1.52592900  | 0.05257700  |
| H  | 2.01492400  | 1.57547900  | -1.52762000 |
| H  | 1.32143900  | 2.44726600  | -0.13720900 |
| C  | 0.53683300  | -0.00095900 | 1.91584900  |
| H  | -0.03232700 | 0.88809600  | 2.17905600  |
| H  | -0.02995800 | -0.89170300 | 2.17845100  |
| H  | 1.49396300  | 0.00013500  | 2.43516500  |

**As<sup>+</sup>.2** Energy = -4903.744288 a.u.

|   |            |            |            |
|---|------------|------------|------------|
| C | 0.00000000 | 0.00000000 | 0.59224000 |
| C | 0.88804900 | 0.77496800 | 1.52631800 |



|    |             |             |             |
|----|-------------|-------------|-------------|
| H  | 1.67008300  | 1.44825900  | 1.20538000  |
| C  | 0.54891300  | 0.47843700  | 2.79143200  |
| H  | 1.01404500  | 0.88106200  | 3.67998100  |
| C  | -0.88804900 | -0.77496800 | 1.52631800  |
| H  | -1.67008300 | -1.44825900 | 1.20538000  |
| C  | -0.54891300 | -0.47843700 | 2.79143200  |
| H  | -1.01404500 | -0.88106200 | 3.67998100  |
| As | -1.10063800 | 1.28919000  | -0.40071300 |
| As | 1.10063800  | -1.28919000 | -0.40071300 |
| C  | 2.16439000  | -0.40281900 | -1.72677800 |
| H  | 2.89582800  | -1.11927100 | -2.10177800 |
| H  | 1.53994400  | -0.07249000 | -2.55551100 |
| H  | 2.68861500  | 0.44064800  | -1.28000900 |
| C  | 0.00000000  | -2.61109500 | -1.24495400 |
| H  | -0.68885300 | -2.15122600 | -1.95008400 |
| H  | 0.65726800  | -3.29548300 | -1.78219000 |
| H  | -0.54932200 | -3.16290700 | -0.48406700 |
| C  | 2.23853700  | -2.13494100 | 0.88301400  |
| H  | 2.69720300  | -2.99855100 | 0.40124000  |
| H  | 3.00749400  | -1.43706000 | 1.20658700  |
| H  | 1.64127300  | -2.46003100 | 1.73308400  |
| C  | -2.16439000 | 0.40281900  | -1.72677800 |
| H  | -2.89582800 | 1.11927100  | -2.10177800 |
| H  | -1.53994400 | 0.07249000  | -2.55551100 |
| H  | -2.68861500 | -0.44064800 | -1.28000900 |
| C  | 0.00000000  | 2.61109500  | -1.24495400 |
| H  | 0.68885300  | 2.15122600  | -1.95008400 |
| H  | -0.65726800 | 3.29548300  | -1.78219000 |
| H  | 0.54932200  | 3.16290700  | -0.48406700 |
| C  | -2.23853700 | 2.13494100  | 0.88301400  |
| H  | -2.69720300 | 2.99855100  | 0.40124000  |
| H  | -3.00749400 | 1.43706000  | 1.20658700  |
| H  | -1.64127300 | 2.46003100  | 1.73308400  |

**N.1** Energy = -328.066829 a.u.

|   |             |             |             |
|---|-------------|-------------|-------------|
| C | 0.05477200  | 0.00028900  | 0.38972300  |
| C | 0.96421500  | -1.17315200 | 0.12392700  |
| H | 0.66289300  | -2.20540200 | 0.21225900  |
| C | 2.19258600  | -0.73318400 | -0.15757400 |
| H | 3.06098800  | -1.34876600 | -0.34609100 |
| C | 0.96435600  | 1.17340800  | 0.12299400  |
| H | 0.66308600  | 2.20577000  | 0.21015800  |
| C | 2.19269900  | 0.73308100  | -0.15805300 |
| H | 3.06114700  | 1.34840300  | -0.34720800 |
| C | -1.98716000 | -1.18914100 | -0.06453600 |

|   |             |             |             |
|---|-------------|-------------|-------------|
| H | -2.92678600 | -1.13778700 | -0.61522500 |
| H | -1.45975900 | -2.08246400 | -0.39447700 |
| H | -2.22568700 | -1.30109400 | 1.00866000  |
| C | -1.98789700 | 1.18871200  | -0.06346800 |
| H | -1.46063300 | 2.08273700  | -0.39170900 |
| H | -2.92708000 | 1.13776800  | -0.61495300 |
| H | -2.22722600 | 1.29905800  | 1.00971600  |
| N | -1.20589200 | 0.00015300  | -0.33958800 |
| H | -0.14112500 | 0.00062600  | 1.48790900  |

**N.2** Energy = -462.028299 a.u.

|   |             |             |             |
|---|-------------|-------------|-------------|
| C | 0.00000000  | 0.00000000  | 0.24232000  |
| C | -0.99013300 | 0.62859100  | 1.22155100  |
| H | -1.89479400 | 1.13206200  | 0.91841200  |
| C | -0.62600000 | 0.38338500  | 2.47676900  |
| H | -1.17069900 | 0.67734900  | 3.36294100  |
| C | 0.99013300  | -0.62859100 | 1.22155100  |
| H | 1.89479400  | -1.13206200 | 0.91841200  |
| C | 0.62600000  | -0.38338500 | 2.47676900  |
| H | 1.17069900  | -0.67734900 | 3.36294100  |
| C | 0.00000000  | 2.18625100  | -1.01123300 |
| H | 0.72252000  | 2.97241900  | -1.24532100 |
| H | -0.57691100 | 1.98881900  | -1.92823100 |
| H | -0.67253200 | 2.58380100  | -0.25544200 |
| C | 1.67484900  | 0.55251800  | -1.48136300 |
| H | 1.20751900  | 0.23000300  | -2.42557100 |
| H | 2.38218400  | 1.35060700  | -1.72027700 |
| H | 2.24531900  | -0.28679600 | -1.08717300 |
| C | 0.00000000  | -2.18625100 | -1.01123300 |
| H | -0.72252000 | -2.97241900 | -1.24532100 |
| H | 0.57691100  | -1.98881900 | -1.92823100 |
| H | 0.67253200  | -2.58380100 | -0.25544200 |
| C | -1.67484900 | -0.55251800 | -1.48136300 |
| H | -2.24531900 | 0.28679600  | -1.08717300 |
| H | -1.20751900 | -0.23000300 | -2.42557100 |
| H | -2.38218400 | -1.35060700 | -1.72027700 |
| N | 0.71759100  | 1.03346300  | -0.51152100 |
| N | -0.71759100 | -1.03346300 | -0.51152100 |

**P.1** Energy = -614.708512 a.u.

|   |            |             |             |
|---|------------|-------------|-------------|
| C | 0.35124400 | -0.32590700 | 0.78225400  |
| H | 0.19019400 | -0.85568100 | 1.72854300  |
| C | 0.88609800 | -1.22842800 | -0.27738500 |
| H | 0.38502400 | -2.11997600 | -0.62372200 |
| C | 2.05656000 | -0.74850700 | -0.72393000 |
| H | 2.66758800 | -1.18367900 | -1.50247300 |

|   |             |             |             |
|---|-------------|-------------|-------------|
| C | 1.41974100  | 0.71304500  | 0.90924100  |
| H | 1.37231300  | 1.53710800  | 1.60612800  |
| C | 2.38873700  | 0.46596700  | 0.01576100  |
| H | 3.27918800  | 1.05900600  | -0.13826500 |
| P | -1.30143800 | 0.49486400  | 0.43983200  |
| C | -1.04394300 | 1.13091400  | -1.26428000 |
| H | -0.69710000 | 0.36160200  | -1.95542100 |
| H | -1.98976600 | 1.53802900  | -1.62540200 |
| H | -0.31434500 | 1.94049700  | -1.24247000 |
| C | -2.33632100 | -0.98366400 | 0.07702400  |
| H | -3.34330100 | -0.64867100 | -0.17691400 |
| H | -1.95022100 | -1.58384600 | -0.74849700 |
| H | -2.41069500 | -1.60786600 | 0.96889500  |

**P.2** Energy = -1035.301577 a.u.

|   |             |             |             |
|---|-------------|-------------|-------------|
| C | 0.00000000  | 0.00000000  | 0.51712900  |
| C | 0.00059700  | 1.16180000  | 1.46508700  |
| H | -0.01252300 | 2.19284500  | 1.14307700  |
| C | 0.00000000  | 0.72370500  | 2.73606200  |
| H | -0.00807200 | 1.34446900  | 3.62070100  |
| C | -0.00059700 | -1.16180000 | 1.46508700  |
| H | 0.01252300  | -2.19284500 | 1.14307700  |
| C | 0.00000000  | -0.72370500 | 2.73606200  |
| H | 0.00807200  | -1.34446900 | 3.62070100  |
| P | -1.70836500 | -0.01020800 | -0.27193900 |
| P | 1.70836500  | 0.01020800  | -0.27193900 |
| C | -1.80265800 | -1.60472900 | -1.18978500 |
| H | -1.78325300 | -2.43740700 | -0.48700600 |
| H | -2.77473900 | -1.62324700 | -1.68726900 |
| H | -1.02876800 | -1.74801600 | -1.94113400 |
| C | -1.56911500 | 1.14070700  | -1.70179700 |
| H | -2.55779500 | 1.21634200  | -2.15825900 |
| H | -1.28879500 | 2.13619400  | -1.35626000 |
| H | -0.86230000 | 0.81114100  | -2.46356000 |
| C | 1.80265800  | 1.60472900  | -1.18978500 |
| H | 1.78325300  | 2.43740700  | -0.48700600 |
| H | 2.77473900  | 1.62324700  | -1.68726900 |
| H | 1.02876800  | 1.74801600  | -1.94113400 |
| C | 1.56911500  | -1.14070700 | -1.70179700 |
| H | 2.55779500  | -1.21634200 | -2.15825900 |
| H | 1.28879500  | -2.13619400 | -1.35626000 |
| H | 0.86230000  | -0.81114100 | -2.46356000 |

**As.1** Energy = -2509.286938 a.u.

|   |            |             |            |
|---|------------|-------------|------------|
| C | 0.68858100 | -0.31032800 | 0.86440600 |
| H | 0.50426400 | -0.67890500 | 1.87680000 |

|    |             |             |             |
|----|-------------|-------------|-------------|
| C  | 1.27321700  | -1.32070800 | -0.04959000 |
| H  | 0.84832500  | -2.29752600 | -0.22558900 |
| C  | 2.37947500  | -0.81472600 | -0.62221000 |
| H  | 3.00189200  | -1.31138800 | -1.35337200 |
| C  | 1.65761700  | 0.81809700  | 0.79727300  |
| H  | 1.55898200  | 1.73319100  | 1.36334300  |
| C  | 2.61730500  | 0.52299100  | -0.09588200 |
| H  | 3.43814600  | 1.16443800  | -0.38377400 |
| As | -1.11599500 | 0.38488300  | 0.28996200  |
| C  | -1.97242200 | -1.33981900 | -0.11013100 |
| H  | -3.00207200 | -1.15202700 | -0.41548000 |
| H  | -1.45412000 | -1.87210900 | -0.90675400 |
| H  | -1.98981100 | -1.95765500 | 0.78801500  |
| C  | -0.68305400 | 0.89200800  | -1.55315800 |
| H  | -0.03961100 | 0.15170200  | -2.02788600 |
| H  | -1.61733600 | 0.97422600  | -2.10963800 |
| H  | -0.18512900 | 1.85982900  | -1.55867100 |

**O<sup>+</sup>.1** Energy = -348.262314 a.u.

|   |             |             |             |
|---|-------------|-------------|-------------|
| C | -0.08806500 | -0.17950100 | 0.65985700  |
| H | 0.13790700  | -0.58833100 | 1.64675200  |
| C | -1.08555000 | 0.93630000  | 0.74711700  |
| H | -0.92879000 | 1.83601900  | 1.32180000  |
| C | -2.18545900 | 0.54771800  | 0.10324800  |
| H | -3.11688200 | 1.09196200  | 0.04928700  |
| C | -0.72079400 | -1.19395500 | -0.24993100 |
| H | -0.27097000 | -2.13451300 | -0.52906500 |
| C | -1.95753100 | -0.77627000 | -0.51847100 |
| H | -2.70248100 | -1.31853600 | -1.08231100 |
| O | 1.24106200  | 0.31960400  | 0.18216900  |
| C | 2.36051300  | -0.58352800 | 0.43353300  |
| H | 3.26138300  | -0.04331000 | 0.15817400  |
| H | 2.35545900  | -0.80160000 | 1.49697300  |
| H | 2.23789500  | -1.48487800 | -0.16538500 |
| C | 1.24031500  | 0.88618100  | -1.17018000 |
| H | 1.24281200  | 0.07429300  | -1.89445200 |
| H | 0.34185400  | 1.48994000  | -1.24923600 |
| H | 2.13274100  | 1.50045200  | -1.24092400 |

**O<sup>+</sup>.2** Energy = -502.276756 a.u.

|   |             |             |            |
|---|-------------|-------------|------------|
| C | 0.00000000  | 0.00000000  | 0.11588400 |
| C | -1.16916700 | 0.26031300  | 1.02893500 |
| H | -2.17463000 | 0.46265400  | 0.69225100 |
| C | -0.73077000 | 0.14817900  | 2.27931800 |
| H | -1.32929800 | 0.25088900  | 3.17385800 |
| C | 1.16916700  | -0.26031300 | 1.02893500 |

|   |             |             |             |
|---|-------------|-------------|-------------|
| H | 2.17463000  | -0.46265400 | 0.69225100  |
| C | 0.73077000  | -0.14817900 | 2.27931800  |
| H | 1.32929800  | -0.25088900 | 3.17385800  |
| O | 0.24971100  | 1.10974500  | -0.82112400 |
| C | 1.50378700  | 1.03693700  | -1.62570000 |
| H | 1.64952900  | -0.00227100 | -1.89925700 |
| H | 1.31502400  | 1.64517300  | -2.50520200 |
| H | 2.31951000  | 1.42642900  | -1.02095400 |
| C | 0.00000000  | 2.48591300  | -0.28922100 |
| H | 0.63556700  | 2.63329800  | 0.58138900  |
| H | 0.26399800  | 3.15144100  | -1.10509300 |
| H | -1.05597600 | 2.54922300  | -0.05563900 |
| O | -0.24971100 | -1.10974500 | -0.82112400 |
| C | 0.00000000  | -2.48591300 | -0.28922100 |
| H | -0.63556700 | -2.63329800 | 0.58138900  |
| H | -0.26399800 | -3.15144100 | -1.10509300 |
| H | 1.05597600  | -2.54922300 | -0.05563900 |
| C | -1.50378700 | -1.03693700 | -1.62570000 |
| H | -1.31502400 | -1.64517300 | -2.50520200 |
| H | -2.31951000 | -1.42642900 | -1.02095400 |
| H | -1.64952900 | 0.00227100  | -1.89925700 |

**S<sup>+</sup>.1** Energy = -671.287775 a.u.

|   |             |             |             |
|---|-------------|-------------|-------------|
| C | -0.35972100 | 0.31858500  | -0.76990000 |
| H | -0.18873600 | 0.81451900  | -1.73120400 |
| C | -1.39494200 | -0.77160400 | -0.86883400 |
| H | -1.32843100 | -1.60365400 | -1.55351800 |
| C | -2.38619900 | -0.48165200 | -0.02274300 |
| H | -3.29207800 | -1.05451800 | 0.11087900  |
| C | -0.89881800 | 1.24255000  | 0.28001300  |
| H | -0.42661800 | 2.16353300  | 0.58497300  |
| C | -2.08103200 | 0.76943100  | 0.68531000  |
| H | -2.73721600 | 1.24049400  | 1.40278500  |
| S | 1.24846300  | -0.44423400 | -0.38404200 |
| C | 2.32711400  | 0.95652500  | -0.10258100 |
| H | 3.31110300  | 0.56002800  | 0.14263500  |
| H | 2.38569600  | 1.51738400  | -1.03401400 |
| H | 1.94718300  | 1.57717200  | 0.70558200  |
| C | 1.02489400  | -1.09861400 | 1.26552500  |
| H | 0.64834300  | -0.32567400 | 1.93160300  |
| H | 0.32182900  | -1.92548800 | 1.19183800  |
| H | 1.99574200  | -1.46737000 | 1.59237500  |

**S<sup>+</sup>.2** Energy = -1148.318863 a.u.

|   |             |            |            |
|---|-------------|------------|------------|
| C | 0.00000000  | 0.00000000 | 0.51106000 |
| C | -1.18683900 | 0.00149400 | 1.44952400 |

|   |             |             |             |
|---|-------------|-------------|-------------|
| H | -2.21676900 | -0.00699300 | 1.12593900  |
| C | -0.73036600 | -0.00047000 | 2.70841100  |
| H | -1.34387300 | -0.00408100 | 3.59845600  |
| C | 1.18683900  | -0.00149400 | 1.44952400  |
| H | 2.21676900  | 0.00699300  | 1.12593900  |
| C | 0.73036600  | 0.00047000  | 2.70841100  |
| H | 1.34387300  | 0.00408100  | 3.59845600  |
| S | 0.00000000  | 1.64142400  | -0.29221700 |
| S | 0.00000000  | -1.64142400 | -0.29221700 |
| C | -1.48058700 | 1.82227900  | -1.28858200 |
| H | -2.34279600 | 1.71340400  | -0.63380900 |
| H | -1.44895500 | 2.85020700  | -1.65461600 |
| H | -1.50730700 | 1.12899100  | -2.12372600 |
| C | 1.30435500  | 1.69032500  | -1.52231000 |
| H | 1.37959100  | 2.73653400  | -1.82284400 |
| H | 2.23723700  | 1.39656700  | -1.04454700 |
| H | 1.06922000  | 1.07206500  | -2.38482000 |
| C | 1.48058700  | -1.82227900 | -1.28858200 |
| H | 2.34279600  | -1.71340400 | -0.63380900 |
| H | 1.44895500  | -2.85020700 | -1.65461600 |
| H | 1.50730700  | -1.12899100 | -2.12372600 |
| C | -1.30435500 | -1.69032500 | -1.52231000 |
| H | -1.37959100 | -2.73653400 | -1.82284400 |
| H | -2.23723700 | -1.39656700 | -1.04454700 |
| H | -1.06922000 | -1.07206500 | -2.38482000 |

**Se<sup>+.1</sup> Energy = -2674.700236 a.u.**

|    |             |             |             |
|----|-------------|-------------|-------------|
| C  | -0.68977700 | 0.32054500  | -0.83264200 |
| H  | -0.51251300 | 0.70005800  | -1.84225300 |
| C  | -1.64669900 | -0.83689400 | -0.77830300 |
| H  | -1.54300900 | -1.73629400 | -1.36682000 |
| C  | -2.63250200 | -0.52302700 | 0.06803800  |
| H  | -3.48708600 | -1.14059900 | 0.30229500  |
| C  | -1.27062700 | 1.32478300  | 0.10759100  |
| H  | -0.86088200 | 2.30771100  | 0.28086700  |
| C  | -2.40290100 | 0.82094800  | 0.61211000  |
| H  | -3.07200700 | 1.32759700  | 1.29251100  |
| Se | 1.07684900  | -0.35686000 | -0.27559400 |
| C  | 2.01574700  | 1.29445100  | 0.08265800  |
| H  | 1.49861000  | 1.84447300  | 0.86405600  |
| H  | 3.02458200  | 1.02816300  | 0.39095600  |
| H  | 2.04903100  | 1.86198400  | -0.84500100 |
| C  | 0.69181100  | -0.90631600 | 1.53411000  |
| H  | 0.03938200  | -0.16954000 | 1.99706900  |
| H  | 0.21432000  | -1.88082200 | 1.48357800  |

H 1.64637200 -0.97643500 2.05155700

**Se+.2** Energy = -5155.150970 a.u.

|    |             |             |             |
|----|-------------|-------------|-------------|
| C  | 0.00000000  | 0.00000000  | 0.66290600  |
| C  | -1.18433000 | -0.00767700 | 1.59335700  |
| H  | -2.21467100 | -0.00340200 | 1.26894900  |
| C  | -0.72994800 | -0.00388400 | 2.85546000  |
| H  | -1.34331100 | -0.00397600 | 3.74545400  |
| C  | 1.18433000  | 0.00767700  | 1.59335700  |
| H  | 2.21467100  | 0.00340200  | 1.26894900  |
| C  | 0.72994800  | 0.00388400  | 2.85546000  |
| H  | 1.34331100  | 0.00397600  | 3.74545400  |
| Se | 0.00000000  | 1.77626900  | -0.19644000 |
| Se | 0.00000000  | -1.77626900 | -0.19644000 |
| C  | 1.63385100  | 1.88043400  | -1.22946000 |
| H  | 1.62891400  | 2.87976100  | -1.66579300 |
| H  | 2.46843000  | 1.79326900  | -0.53745700 |
| H  | 1.66408100  | 1.12610400  | -2.00854900 |
| C  | -1.29468300 | 1.68266400  | -1.63174700 |
| H  | -2.24482300 | 1.36028600  | -1.21105300 |
| H  | -1.39146000 | 2.70318200  | -2.00244400 |
| H  | -0.94691300 | 1.02634400  | -2.42452300 |
| C  | 1.29468300  | -1.68266400 | -1.63174700 |
| H  | 2.24482300  | -1.36028600 | -1.21105300 |
| H  | 1.39146000  | -2.70318200 | -2.00244400 |
| H  | 0.94691300  | -1.02634400 | -2.42452300 |
| C  | -1.63385100 | -1.88043400 | -1.22946000 |
| H  | -1.66408100 | -1.12610400 | -2.00854900 |
| H  | -1.62891400 | -2.87976100 | -1.66579300 |
| H  | -2.46843000 | -1.79326900 | -0.53745700 |

**O.1** Energy = -308.624068 a.u.

|   |             |             |             |
|---|-------------|-------------|-------------|
| C | -0.23088400 | -0.21018700 | 0.35982200  |
| H | -0.46748500 | -0.25110900 | 1.44129600  |
| C | 0.89534100  | -1.17369200 | 0.10990400  |
| H | 0.77067200  | -2.24473600 | 0.15872300  |
| C | 2.01601400  | -0.49054600 | -0.12507600 |
| H | 2.99781400  | -0.91066300 | -0.29165200 |
| C | 0.41427400  | 1.13516300  | 0.10374800  |
| H | -0.10319200 | 2.08028300  | 0.17157500  |
| C | 1.71546100  | 0.95151200  | -0.12641500 |
| H | 2.45089800  | 1.72760900  | -0.28736100 |
| O | -1.37631700 | -0.53255200 | -0.38267600 |
| C | -2.50664800 | 0.22299500  | -0.03525400 |
| H | -2.37933000 | 1.28562700  | -0.27202200 |
| H | -3.34311300 | -0.16548700 | -0.61378400 |

|   |             |            |            |
|---|-------------|------------|------------|
| H | -2.73707600 | 0.12742700 | 1.03425000 |
|---|-------------|------------|------------|

**O.2** Energy = -423.158769 a.u.

|   |             |             |             |
|---|-------------|-------------|-------------|
| C | 0.00000000  | 0.00000000  | -0.03729100 |
| C | -0.00273700 | 1.18532800  | 0.91971200  |
| H | 0.03831800  | 2.21105800  | 0.58724500  |
| C | 0.00000000  | 0.74048000  | 2.17083900  |
| H | 0.01377500  | 1.34933800  | 3.06379200  |
| C | 0.00273700  | -1.18532800 | 0.91971200  |
| H | -0.03831800 | -2.21105800 | 0.58724500  |
| C | 0.00000000  | -0.74048000 | 2.17083900  |
| H | -0.01377500 | -1.34933800 | 3.06379200  |
| O | 1.15338200  | 0.11937000  | -0.82662300 |
| O | -1.15338200 | -0.11937000 | -0.82662300 |
| C | 1.44974600  | -0.99277800 | -1.64467700 |
| H | 0.58238200  | -1.29948100 | -2.23549200 |
| H | 2.24786400  | -0.68022900 | -2.31563700 |
| H | 1.79967100  | -1.84229200 | -1.05029600 |
| C | -1.44974600 | 0.99277800  | -1.64467700 |
| H | -1.79967100 | 1.84229200  | -1.05029600 |
| H | -0.58238200 | 1.29948100  | -2.23549200 |
| H | -2.24786400 | 0.68022900  | -2.31563700 |

**S.1** Energy = -631.616895 a.u.

|   |             |             |             |
|---|-------------|-------------|-------------|
| C | 0.11493500  | -0.11150800 | 0.54713100  |
| H | -0.16987500 | -0.07296400 | 1.60498300  |
| C | 1.22964900  | -1.09274800 | 0.33457500  |
| H | 1.13938500  | -2.14773000 | 0.54539000  |
| C | 2.30170000  | -0.44574900 | -0.13442200 |
| H | 3.25771100  | -0.88980300 | -0.37312700 |
| C | 0.71979600  | 1.18682700  | 0.10493900  |
| H | 0.19072800  | 2.12778700  | 0.11029000  |
| C | 1.98398000  | 0.97753500  | -0.27797800 |
| H | 2.67098800  | 1.72649600  | -0.64592900 |
| S | -1.35045200 | -0.62906300 | -0.39823700 |
| C | -2.53316800 | 0.61214900  | 0.15349800  |
| H | -2.24490100 | 1.61287600  | -0.16645500 |
| H | -3.48783700 | 0.36122600  | -0.30719200 |
| H | -2.65031600 | 0.58808700  | 1.23736800  |

**S.2** Energy = -1069.132422 a.u.

|   |             |             |            |
|---|-------------|-------------|------------|
| C | 0.00000000  | 0.00000000  | 0.25816000 |
| C | 0.00000000  | 1.17262100  | 1.19912200 |
| H | 0.00476800  | 2.19816300  | 0.86268000 |
| C | -0.00100900 | 0.73086600  | 2.46078800 |
| H | -0.00710500 | 1.34775200  | 3.34794900 |
| C | 0.00000000  | -1.17262100 | 1.19912200 |



|   |             |             |             |
|---|-------------|-------------|-------------|
| H | -0.00476800 | -2.19816300 | 0.86268000  |
| C | 0.00100900  | -0.73086600 | 2.46078800  |
| H | 0.00710500  | -1.34775200 | 3.34794900  |
| S | 1.53733300  | 0.10960400  | -0.72183400 |
| S | -1.53733300 | -0.10960400 | -0.72183400 |
| C | 1.49235600  | -1.43575300 | -1.64324100 |
| H | 0.53226000  | -1.55003000 | -2.14609700 |
| H | 2.28185900  | -1.37007700 | -2.39084900 |
| H | 1.68472700  | -2.29224700 | -0.99883400 |
| C | -1.49235600 | 1.43575300  | -1.64324100 |
| H | -0.53226000 | 1.55003000  | -2.14609700 |
| H | -2.28185900 | 1.37007700  | -2.39084900 |
| H | -1.68472700 | 2.29224700  | -0.99883400 |

**Se.1** Energy = -2635.031991 a.u.

|    |             |             |             |
|----|-------------|-------------|-------------|
| C  | 0.53323400  | 0.07292600  | -0.67905400 |
| H  | 0.26824800  | 0.23222400  | -1.72723900 |
| C  | 1.17862200  | 1.26594900  | -0.05583100 |
| H  | 0.71587800  | 2.23971600  | -0.00089700 |
| C  | 2.38531800  | 0.92061900  | 0.41147300  |
| H  | 3.08014900  | 1.57048900  | 0.92416900  |
| C  | 1.55623600  | -1.00355500 | -0.50324300 |
| H  | 1.42148100  | -2.01799500 | -0.84774600 |
| C  | 2.62002900  | -0.49629900 | 0.13278500  |
| H  | 3.51617600  | -1.03679600 | 0.40255200  |
| Se | -1.12417000 | -0.47159400 | 0.23518000  |
| C  | -2.19671100 | 1.07344800  | -0.25926100 |
| H  | -2.23258300 | 1.17970800  | -1.34195000 |
| H  | -3.20226400 | 0.88912400  | 0.11495900  |
| H  | -1.80566900 | 1.97920000  | 0.19882700  |

**Se.2** Energy = -5075.956888 a.u.

|    |             |             |             |
|----|-------------|-------------|-------------|
| C  | 0.05207200  | 0.52977700  | -0.05441400 |
| C  | 0.14550200  | 1.73646600  | -0.94003800 |
| H  | 0.25779100  | 1.67408800  | -2.01238600 |
| C  | 0.06361800  | 2.84285900  | -0.19007000 |
| H  | 0.09671800  | 3.85919800  | -0.55514500 |
| C  | -0.09551500 | 1.12630800  | 1.30539700  |
| H  | -0.17168700 | 0.54102000  | 2.20864000  |
| C  | -0.08436200 | 2.46272500  | 1.21066300  |
| H  | -0.15578900 | 3.15720400  | 2.03543900  |
| Se | -1.54659800 | -0.50067000 | -0.59700500 |
| Se | 1.76101700  | -0.43529700 | -0.25463800 |
| C  | -2.17636900 | -1.16832400 | 1.12027100  |
| H  | -2.54720800 | -0.35426600 | 1.73693500  |
| H  | -2.99432600 | -1.84803200 | 0.88465600  |

|   |             |             |            |
|---|-------------|-------------|------------|
| H | -1.39691900 | -1.71946100 | 1.64054000 |
| C | 1.37133300  | -1.97608800 | 0.85770600 |
| H | 2.25898000  | -2.60589600 | 0.82969500 |
| H | 1.17750200  | -1.67865000 | 1.88662000 |
| H | 0.52700300  | -2.52466800 | 0.44380000 |

**Mn.2** Energy = -5926.556318 a.u.

|    |             |             |             |
|----|-------------|-------------|-------------|
| C  | -0.00350200 | 1.80471500  | 1.12220000  |
| H  | 0.02084100  | 1.51454100  | 2.16745500  |
| C  | -0.01130400 | 3.12339400  | 0.71012500  |
| C  | 0.01063400  | 3.12365100  | -0.70877100 |
| C  | 0.00339400  | 1.80509700  | -1.12130700 |
| H  | -0.02180800 | 1.51527400  | -2.16666400 |
| H  | 0.00407500  | 3.99730100  | -1.34823000 |
| H  | -0.00531800 | 3.99682700  | 1.34988400  |
| C  | 0.00023500  | 0.88220100  | 0.00028900  |
| P  | 4.15509700  | -1.05800300 | 0.22290500  |
| P  | -4.15502500 | -1.05776500 | -0.22388700 |
| Mn | 2.14967800  | -0.20679200 | 0.02632300  |
| Mn | -2.14963300 | -0.20671600 | -0.02648000 |
| H  | -5.24596900 | -0.31040500 | -0.73973700 |
| H  | -4.40131400 | -2.20682600 | -1.02139600 |
| H  | -4.86495800 | -1.54694600 | 0.90694400  |
| H  | 4.86494600  | -1.54646100 | -0.90828500 |
| H  | 5.24606000  | -0.31086500 | 0.73905500  |
| H  | 4.40160300  | -2.20749700 | 1.01972400  |
| P  | 2.92908000  | 1.79050500  | 0.72145600  |
| P  | 2.56260300  | 0.47299500  | -2.06540300 |
| P  | 1.64204500  | -0.76992700 | 2.11339300  |
| P  | 1.56194700  | -2.18347200 | -0.78799500 |
| P  | -1.56215100 | -2.18398100 | 0.78647600  |
| P  | -1.64178300 | -0.76803500 | -2.11404000 |
| P  | -2.56209200 | 0.47060300  | 2.06612500  |
| P  | -2.92941400 | 1.79108000  | -0.71984900 |
| H  | 4.32611200  | 2.01464300  | 0.59625200  |
| H  | 2.50429000  | 2.97189300  | 0.08843700  |
| H  | 2.83393300  | 2.22009700  | 2.06231000  |
| H  | 3.69774900  | -0.06014000 | -2.73473300 |
| H  | 1.67133600  | 0.24107300  | -3.13737600 |
| H  | 2.82260500  | 1.82510100  | -2.37689800 |
| H  | 2.19991300  | -0.05655800 | 3.20363900  |
| H  | 0.32072700  | -0.75779100 | 2.60381000  |
| H  | 1.97098600  | -2.05564200 | 2.61856700  |
| H  | 1.82943800  | -3.35883200 | -0.03791300 |
| H  | 0.28223900  | -2.61525300 | -1.21548500 |

|   |             |             |             |
|---|-------------|-------------|-------------|
| H | 2.22090100  | -2.64266500 | -1.95897700 |
| H | -0.28244700 | -2.61581700 | 1.21381800  |
| H | -2.22092600 | -2.64329300 | 1.95752300  |
| H | -1.82991400 | -3.35914800 | 0.03621000  |
| H | -0.32039700 | -0.75631900 | -2.60443900 |
| H | -1.97140000 | -2.05312000 | -2.62039400 |
| H | -2.19915800 | -0.05341600 | -3.20372100 |
| H | -1.67094100 | 0.23698000  | 3.13795000  |
| H | -2.82269700 | 1.82208900  | 2.37978800  |
| H | -3.69699900 | -0.06403500 | 2.73469900  |
| H | -2.83427000 | 2.22184000  | -2.06032900 |
| H | -4.32653600 | 2.01462200  | -0.59464700 |
| H | -2.50516900 | 2.97211700  | -0.08582000 |
